# Supplementary material for: Apoptosis and DNA intercalating activities of novel emodin derivatives
Source: Royal Society of Chemistry journal article supplement (doi:10.1039/c3ra23149f), 2013-01-01
Supplement: c3ra23149f.pdf [file c3ra23149f.pdf]

## Apoptosis and DNA intercalating activities of novel Emodin derivatives

T. Narender\* P. Sukanya,<sup>a</sup> Komal Sharma,<sup>b</sup> and Surendar Reddy Bathula<sup>b\*</sup>

### Supporting data

### Supporting data

Figure S1

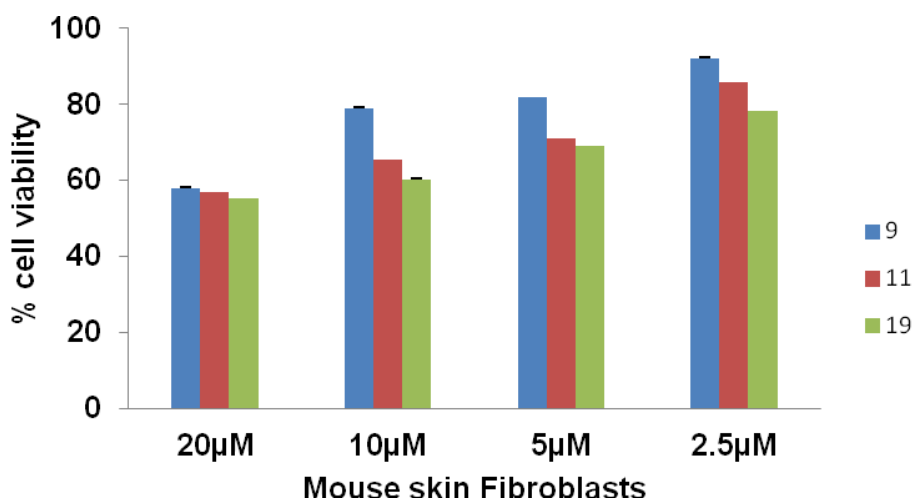

Figure S1: We have evaluated the Cytotoxicity of compounds 9, 11 and 19 against mouse skin fibroblasts using MTT assay.

### 1, 3, 8-trihydroxy-6-methylanthracene-9-10-dione (1):

IR (KBr) 3613, 2925, 1625, 1461, 1373, 1277, 1029, 767, 672  $\text{cm}^{-1}$ ;  $^1\text{H}$  NMR (DMSO- $d_6$ , 300 MHz)  $\delta$  12.03 (s, OH), 11.95 (s, OH), 7.41 (s, 1H), 7.10 (s, 1H), 7.06 (s, 1H), 6.55 (s, 1H), 2.38 (s, 3H);  $^{13}\text{C}$  NMR(DMSO- $d_6$ , 75 MHz)  $\delta$  189.40, 180.92, 165.51, 164.35, 161.30, 148.04, 134.77, 132.47, 123.91, 120.25, 113.04, 108.09, 107.75, 21.45; MS (ESI) m/z 270.

**1, 8-dihydroxy-3-methyl-6-(nonyloxy) anthracene-9, 10-dione (2)**

IR (KBr) 3365, 2359, 1628, 1461, 1217, 1020, 769, 671  $\text{cm}^{-1}$ ;  $^1\text{H}$  NMR ( $\text{CDCl}_3$ , 300 MHz)  $\delta$  12.27 (s, OH), 12.10 (s, OH), 7.59 (s, 1H), 7.32 (s, 1H), 7.05 (s, 1H), 6.64 (s, 1H), 4.07 (t, 2H), 2.43 (s, 3H), 1.82 - 1.78 (m, 2H), 1.58 (s, 2H), 1.45 (s, 2H), 1.25 (s, 6H), 0.85 (t, 3H); MS (ESI)  $m/z$  382; Yield: 66% .

**1, 8-dihydroxy-3-methyl-6-(undecyloxy) anthracene-9, 10-dione (3):**

IR (KBr) 3761, 3414, 2952, 1624, 1318, 1216, 766, 671  $\text{cm}^{-1}$ ;  $^1\text{H}$  NMR ( $\text{CDCl}_3$ , 300 MHz,)  $\delta$  12.49 (s, OH), 12.32 (s, OH), 7.81 (s, 1H), 7.54 (s, 1H), 7.46 (s, 1H), 6.84 (s, 1H), 4.27 (t, 2H), 2.64 (s, 3H), 2.02 - 1.99 (m, 2H), 1.76 (s, 2H), 1.66 (s, 2H), 1.45 (s, 16H), 1.07 (t, 3H) );  $^{13}\text{C}$  NMR( $\text{CDCl}_3$ , 75 MHz)  $\delta$  191.06, 183.04, 167.18, 166.19, 163.45, 149.31, 140.27, 136.16, 134.23, 125.44, 122.21, 115.06, 114.70, 111.00, 109.72, 108.10, 70.04, 34.02, 32.93, 32.63, 30.70, 30.50, 30.53, 30.36, 30.29, 30.16, 29.96, 29.89, 26.89, 23.69, 23.13, 15.11; MS (ESI)  $m/z$  438; Yield: 65%.

**3-(dodecyloxy)-1, 8-dihydroxy-6-methyl anthracene-9, 10-dione (4):**

IR (KBr) 3429, 1627, 1473, 1386, 1303, 1264, 1218, 1032, 769, 670  $\text{cm}^{-1}$ ;  $^1\text{H}$  NMR ( $\text{CDCl}_3$ , 300 MHz,)  $\delta$  12.30 (s, OH), 12.13 (s, OH), 7.62 (s, 1H), 7.35 (s, 1H), 7.07 (s, 1H), 6.85 (s, 1H), 4.08 (t, 2H), 2.44 (s, 3H), 2.05 (s, 2H), 1.85 - 1.80(m, 2H), 1.57 (s, 2H), 1.45 - 1.41 (m, 4H), 1.29 (s, 2OH), 0.86 (t, 3H);  $^{13}\text{C}$  NMR( $\text{CDCl}_3$ , 75 MHz)  $\delta$  190.65, 182.01, 166.16, 165.17, 162.44, 148.31, 136.12, 133.19, 124.43, 121.21, 106.71, 107.08, 69.03, 31.92, 31.62, 29.66, 29.36, 28.88, 25.88, 22.69, 22.13, 14.12; MS (ESI)  $m/z$  452; Yield: 65%.

**1, 8-dihydroxy-3-methyl-6-(pentadecyloxy) anthracene-9, 10-dione (5):**

IR (KBr) 3490, 2924, 1627, 1452, 1217, 769, 670  $\text{cm}^{-1}$ ;  $^1\text{H}$  NMR ( $\text{CDCl}_3$ , 300 MHz,)  $\delta$  7.61 (s, 1H), 7.34 (s, 1H), 7.06 (s, 1H), 6.65 (s, 1H), 4.07 (t, 2H), 2.44 (s, 3H), 2.02 (t, 2H), 1.84 - 1.79 (m, 2H), 1.56 (s, 2H), 1.25 (s, 24H), 0.87 (t, 3H);  $^{13}\text{C}$  NMR( $\text{CDCl}_3$ , 75 MHz)  $\delta$  190.69, 182.05, 166.19, 166.20, 162.47, 148.32, 139.27, 135.17, 133.24, 124.45, 121.22, 114.06, 113.70, 110.03, 108.72, 107.10, 69.04, 33.83, 31.93, 31.63, 29.70, 29.54, 29.37, 29.30, 29.16, 28.96, 28.89, 25.89, 22.70, 22.13, 14.12; MS (ESI)  $m/z$  494; Yield: 62%.

**1, 8-dihydroxy-3-methyl-6-(octadecyloxy) anthracene-9, 10-dione (6)**

IR (KBr) 3407, 2952, 1631, 1363, 1217, 1012, 769, 670  $\text{cm}^{-1}$ ;  $^1\text{H}$  NMR ( $\text{CDCl}_3$ , 300 MHz,)  $\delta$  12.29 (s, OH), 12.12 (s, OH), 7.61 (s, 1H), 7.34 (s, 1H), 7.07 (s, 1H), 6.66 (s, 1H), 4.09 (t, 2H), 2.45 (s, 3H), 1.86 - 1.82 (m, 2H), 1.60 (s, 2H), 1.47 - 1.43 (m, 2H), 1.27 (s, 28H), 0.87 (t, 3H); MS (ESI)  $m/z$  522; Yield: 65%.

**1, 8-dihydroxy-3-methyl-6-(icosyloxy) anthracene-9, 10-dione (7):**

IR (KBr) 3289, 2368, 1658, 1584, 1458, 1218, 769, 670  $\text{cm}^{-1}$ ;  $^1\text{H}$  NMR ( $\text{CDCl}_3$ , 300 MHz,)  $\delta$  12.31 (s, OH), 12.15 (s, OH), 7.64 (s, 1H), 7.37 (s, 1H), 7.09 (s, 1H), 6.68 (s, 1H), 4.10 (t, 2H), 2.46 (s, 3H), 2.05 (t, 2H), 1.87 - 1.82 (m, 2H), 1.59 (s, 2H), 1.34 (s, 31H), 0.88 (t, 3H);  $^{13}\text{C}$  NMR( $\text{CDCl}_3$ , 75 MHz)  $\delta$  190.11, 181.47, 165.61, 164.62, 161.89, 147.74, 138.69, 134.59, 132.66, 123.87, 120.54, 113.48, 113.12, 109.45, 108.14, 106.52, 68.45, 32.25, 31.35, 31.05, 29.12, 29.0, 28.79, 28.72, 28.59, 28.38, 28.31, 25.31, 22.12, 21.55, 13.54; MS (ESI)  $m/z$  550; Yield: 63%.

**3-(docosyloxy)-1, 8-dihydroxy-6-methyl anthracene-9, 10-dione (8):**

IR(KBr) 3388, 2362, 1624, 1365, 1217, 767, 672  $\text{cm}^{-1}$ ;  $^1\text{H}$  NMR ( $\text{CDCl}_3$ , 300 MHz,)  $\delta$  12.29 (s, OH), 12.12 (s, OH), 7.61 (s, 1H), 7.34 (s, 1H), 7.06 (s, 1H), 6.65 (s, 1H), 4.08 (t, 2H), 2.44 (s, 3H), 2.05 (t, 2H), 1.82 (s, 2H), 1.25 (s, 34H), 0.88 (t, 3H); MS (ESI)  $m/z$  578; Yield: 64%.

**(E)-3-(3, 7-dimethylocta-2, 6-dienyloxy) 1, 8-dihydroxy-6-methyl anthracene-9, 10-dione (9):**

IR (KBr) 3349, 2367, 1718, 1624, 1364, 1218, 770, 650  $\text{cm}^{-1}$ ;  $^1\text{H}$  NMR ( $\text{CDCl}_3$ , 300 MHz,)  $\delta$   $^1\text{H}$  12.32 (s, OH), 12.16 (s, OH), 7.64 (s, 1H), 7.28 (s, 1H), 7.10 (s, 1H), 6.70 (s, 1H), 5.51 (t, 1H), 5.11 (s, 1H), 4.71 (t, 2H), 2.47 (s, 3H), 2.14 (s, 4H), 1.80 (s, 6H), 1.73 (s, 3H); MS (ESI)  $m/z$  406; Yield: 62%.

**1, 8-dihydroxy-3-methyl-6-(prop-2-ynyloxy) anthracene-9, 10-dione (10):**

IR (KBr) 3282, 2922, 2125, 2357, 1717, 1631, 1390, 1218, 1078, 766, 680  $\text{cm}^{-1}$ ;  $^1\text{H}$  NMR ( $\text{CDCl}_3$ , 300 MHz)  $\delta$  12.12 (s, OH), 12.01 (s, OH), 7.80 (s, 1H), 7.66 (s, 1H), 7.64 (s, 1H), 7.096 (s, 1H), 4.03 (s, 2H), 2.85 (s, 1H), 2.46 (s, 3H); MS (ESI)  $m/z$  308; Yield: 60%.

**3-(2-(dimethylamino) ethoxy)-1, 8-dihydroxy-6-methylanthracene-9, 10-Dione (11):**

IR (KBr) 3413, 2924, 1630, 1433, 1216, 1028, 925, 764, 672  $\text{cm}^{-1}$ ;  $^1\text{H}$  NMR ( $\text{CDCl}_3$ , 300 MHz,)  $\delta$  12.27 (s, OH), 12.09 (s, OH), 7.61 (s, 1H), 7.35 (s, 1H), 7.07 (s, 1H), 6.68 (s, 1H), 4.25 (t, 2H), 2.86 (t, 2H), 2.62 (s, 6H), 2.45 (s, 3H); MS (ESI)  $m/z$  341; Yield: 75%.

**3-(2-(diisopropylamino) ethoxy)-1, 8-dihydroxy-6-methylanthracene-9, 10-Dione (12):**

IR (KBr) 3349, 2360, 1615, 1452, 1217, 1020, 769, 672  $\text{cm}^{-1}$ ;  $^1\text{H}$  NMR ( $\text{CDCl}_3$ , 300 MHz,)  $\delta$  12.10 (br, 2H), 7.58 (s, 1H), 7.31 (s, 1H), 7.04 (s, 1H), 6.64 (s, 1H), 4.04 (t, 2H), 3.10 (t, 2H), 2.89 (t, 2H), 2.42 (s, 3H), 1.08 (d, 12H);  $^{13}\text{C}$  NMR( $\text{CDCl}_3$ , 75 MHz)  $\delta$  190.60, 181.95, 165.91, 165.12, 162.41, 148.32, 135.10, 133.15, 124.42, 121.20, 113.63, 108.65, 107.20, 69.76, 49.91, 44.14, 22.1, 20.61; MS (ESI)  $m/z$  397; Yield: 80%.

**4, 5 di hydroxyl-7-methyl-9, 10-dioxo-9, 10-dihydroanthracene-2-yl 2-acetobenzoate (13):**

IR (KBr) 3493, 3142, 1715, 1629, 1451, 1189, 762, 662;  $^1\text{H}$  NMR ( $\text{CDCl}_3$ , 300 MHz) 12.22 (s, OH), 11.95 (s, OH), 8.23 (d, 1H), 7.70 -7.65 (m, 3H), 7.41 (s, 1H), 7.21 (s, 1H), 7.16 (s, 1H), 7.11 (s, 1H), 2.46 (s, 3H), 2.33 (s, 3H); MS (ESI)  $m/z$  432; Yield: 65%.

**(S)-4, 5-dihydroxy-7-methyl-9, 10-dioxo-9, 10-dihydroanthracen-2-yl 2-(7-methoxynaphthalen-2-yl) propanoate (14):**

IR (KBr) 3369, 1713, 1629, 1451, 1373, 1217, 1059, 765, 665;  $^1\text{H}$  NMR ( $\text{CDCl}_3$ , 300 MHz) 12.13 (s, OH), 11.92 (s, OH), 7.75 (t, 3H), 7.60 (s, 1H), 7.45 (d, 2H), 7.14 (d, 2H), 7.07 (s, 1H), 6.94 (s, 1H), 4.11 (q, 1H), 3.92 (s, 3H), 2.43 (s, 3H), 1.72 (d, 3H); MS (ESI)  $m/z$  482; Yield: 62%.

**4, 5-dihydroxy-7-methyl-9, 10-dioxo-9, 10-dihydroanthracen-2-yl cinnamate (15):**

IR (KBr) 3322, 1733, 1623, 1464, 1375, 1216, 1134, 1023, 767; <sup>1</sup>H NMR (CDCl<sub>3</sub>, 300 MHz) 12.22 (s, OH), 11.98 (s, OH), 7.96 (d, 1H), 7.66-7.61 (m, 4H), 7.47-7.45 (m, 3H), 7.18 (s, 1H), 7.12 (s, 1H), 6.66 (d, 1H), 2.48 (s, 3H); MS (ESI) m/z 400; Yield: 64%.

**4, 5-dihydroxy-7-methyl-9, 10-dioxo-9, 10-dihydroanthracen-2-yl isonicotinate (16):**

IR (KBr) 3439, 3023, 2928, 1773, 1718, 1620, 1388, 1220, 1077, 972, 758, 521 cm<sup>-1</sup>; <sup>1</sup>H NMR (CDCl<sub>3</sub>, 300 MHz) 8.43 (s, 2H), 7.80 (s, 2H), 7.59 (s, 1H), 7.19 (s, 1H), 7.03 (s, 1H), 6.58 (s, 1H), 2.43 (s, 3H); MS (ESI) m/z 375; Yield: 60%.

**6-methyl-9, 10-dioxo-9, 10-dihydroanthracene-1, 3, 8-triyl triacetate (17):**

IR (KBr) 3407, 2927, 1761, 1668, 1605, 1457, 1324, 1206, 1029, 908, 766, 674 cm<sup>-1</sup>; <sup>1</sup>H NMR (CDCl<sub>3</sub>, 300 MHz) 8.01 (s, 1H), 7.95 (s, 1H), 7.23 (s, 1H), 7.22 (s, 1H), 2.50 (s, 3H), 2.43 (s, 6H), 2.35 (s, 3H); MS (ESI) m/z 396; Yield: 98%.

**4, 5, 7-triacetoxy-9, 10-dioxo-9, 10-dihydroanthracene-2-carboxylic acid (18):**

IR (KBr) 3416, 3024, 2927, 2367, 1770, 1648, 1460, 1372, 1215, 1029, 923, 761, 672 cm<sup>-1</sup>; <sup>1</sup>H NMR (DMSO-d<sup>6</sup>, 300 MHz) 8.12 (s, 1H), 7.95 (s, 1H), 7.93 (s, 1H), 7.63 (s, 1H), 2.39 (s, 9H); <sup>13</sup>C NMR (DMSO-d<sup>6</sup>, 75 MHz) δ 180.14, 179.37, 168.40, 166.29, 165.02, 154.69, 150.99, 149.81, 136.56, 135.26, 134.43, 132.51, 124.98, 123.96, 123.08, 121.93, 120.39, 20.88; MS (ESI) m/z 426; Yield: 80%.

**4, 5, 7-trihydroxy-9, 10-dioxo-N-(2-(piperidin-1-yl) ethyl)-9, 10-dihydroanthracene-2-carboxamide (19)**

IR (KBr) 3452, 3229, 2920, 1720, 1525, 1452, 1217, 765, 630 cm<sup>-1</sup>; <sup>1</sup>H NMR (DMSO-d<sup>6</sup>, 300 MHz) 8.38 (s, 1H), 7.99 (s, 1H), 7.86 (s, 1H), 7.41 (s, 1H), 6.77 (s, 1H), 4.03 (t, 2H), 3.27 (t, 2H), 3.19 (s, 4H), 2.13 (t, 4H), 1.96 (t, 2H); MS (ESI) m/z 408; Yield: 85%.

**4, 5, 7-trihydroxy-N-(2-morpholinoethyl)-9, 10-dioxo-9, 10-dihydroanthracene-2-carboxamide (20):**

IR (KBr) 3594, 3229, 2360, 1720, 1520, 1452, 1212, 767, 640  $\text{cm}^{-1}$ ;  $^1\text{H}$  NMR (DMSO- $d_6$ , 300 MHz) 8.11 (s, 1H), 7.70 (s, 1H), 7.42 (s, 1H), 7.24 (s, 1H), 6.60 (s, 1H), 3.78 (t, 2H), 3.59 (t, 2H), 2.67 (t, 2H), 2.59 (s, 4H); MS (ESI)  $m/z$  410; Yield: 85%.

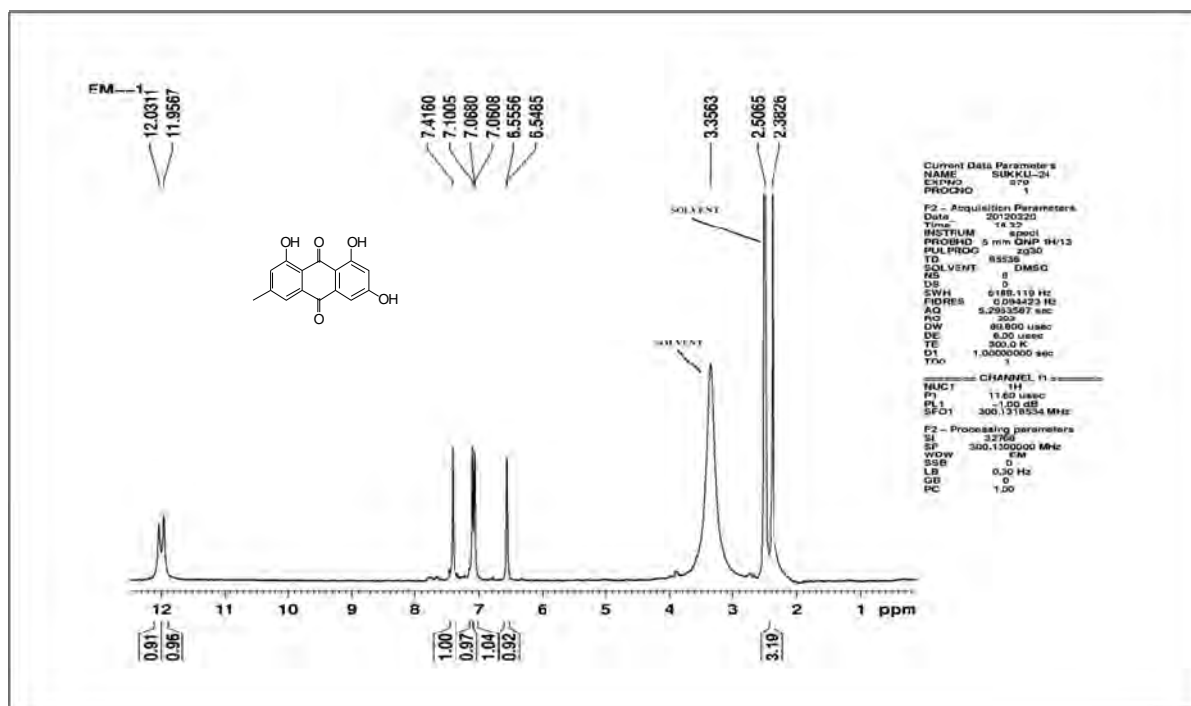

Proton NMR spectrum of compound 1

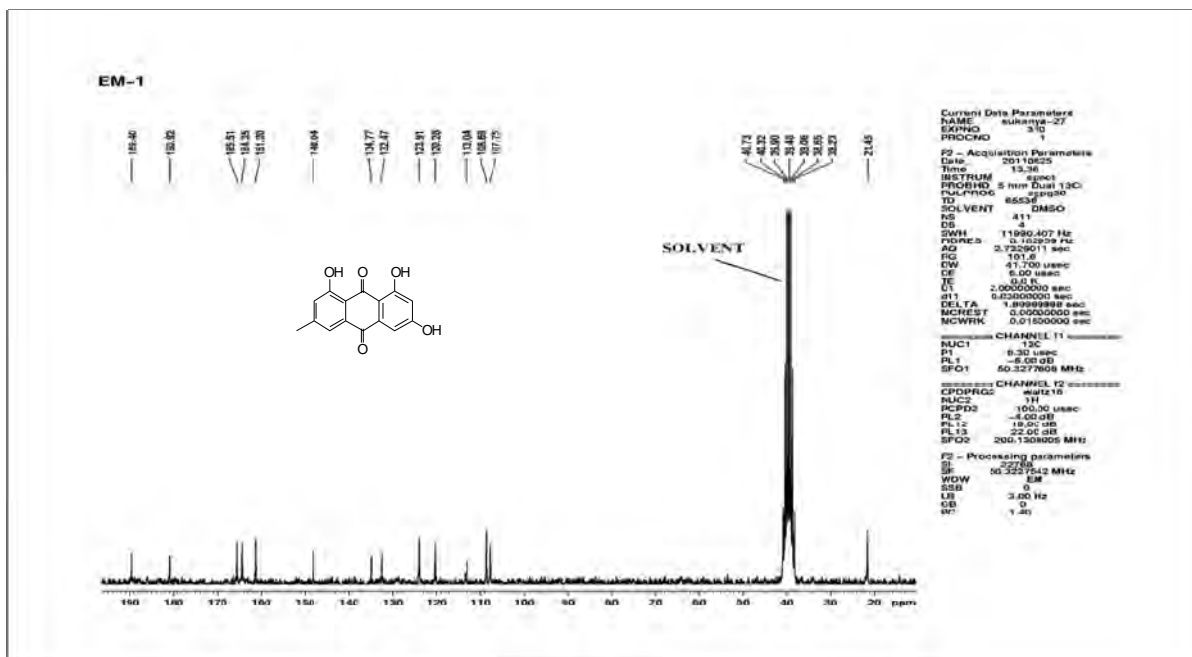

Carbon-13 NMR spectrum of compound 1

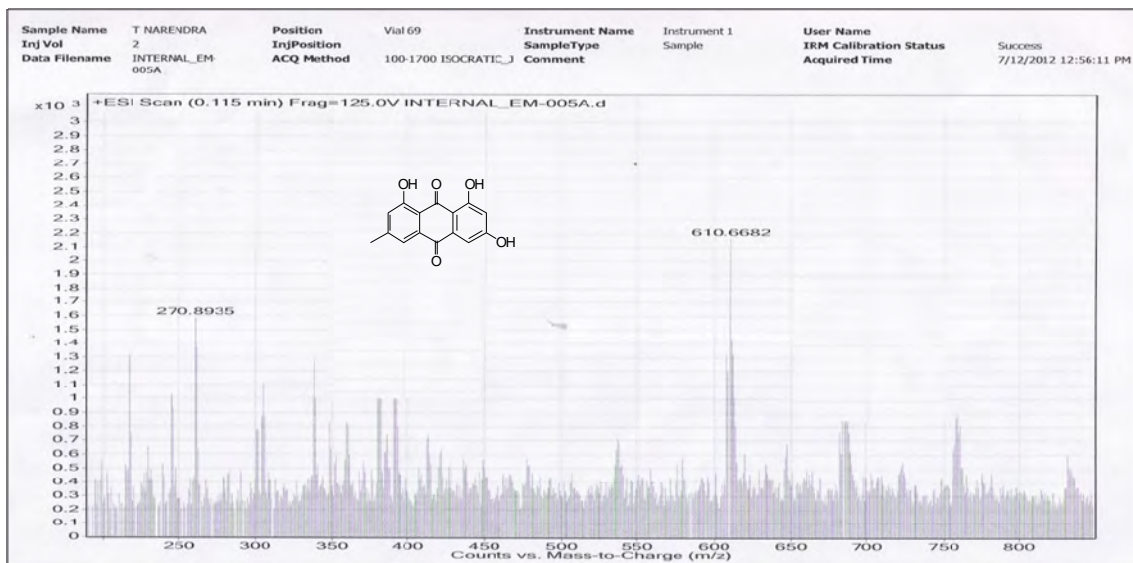

Mass spectrum of compound 1

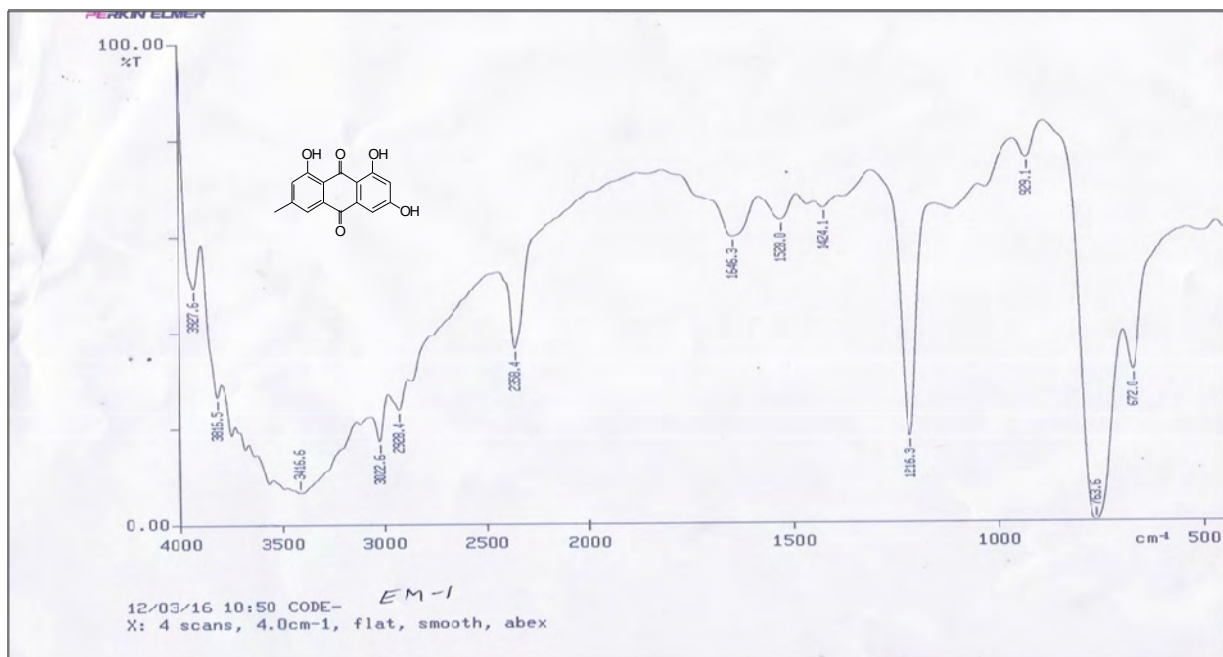

IR spectrum of compound 1

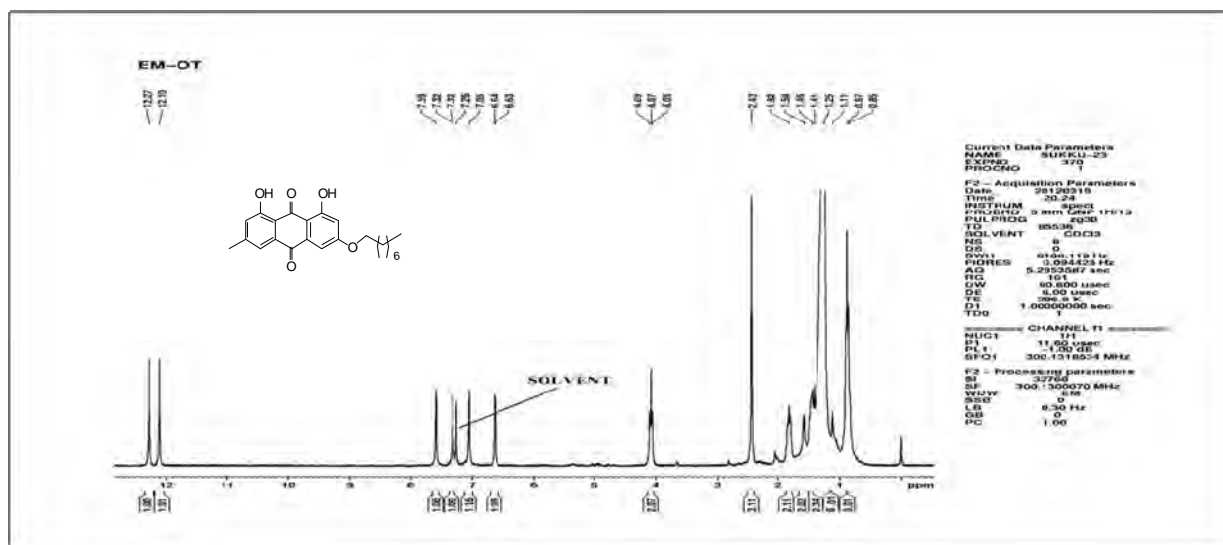

Proton NMR spectrum of compound 2



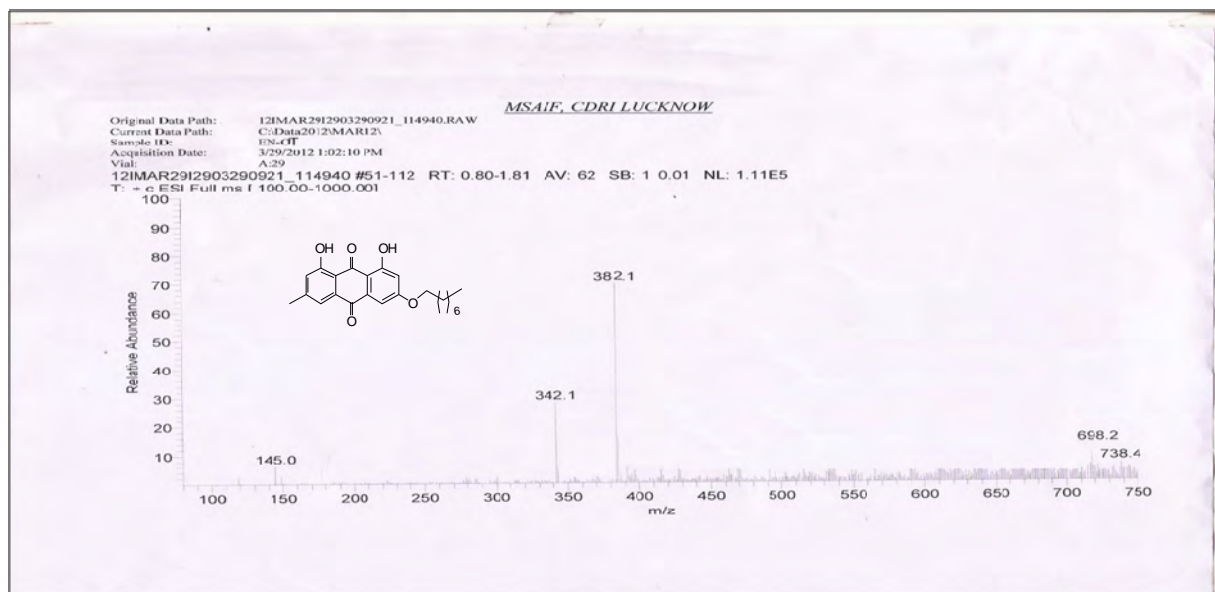

Mass spectrum of compound 2

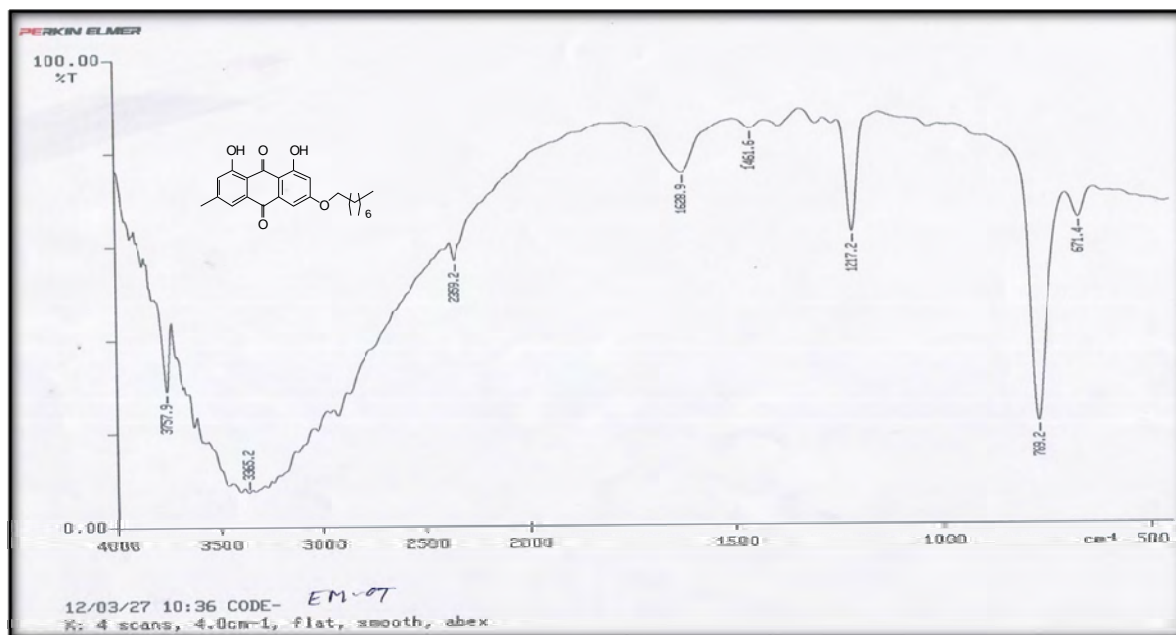

IR spectrum of compound 2

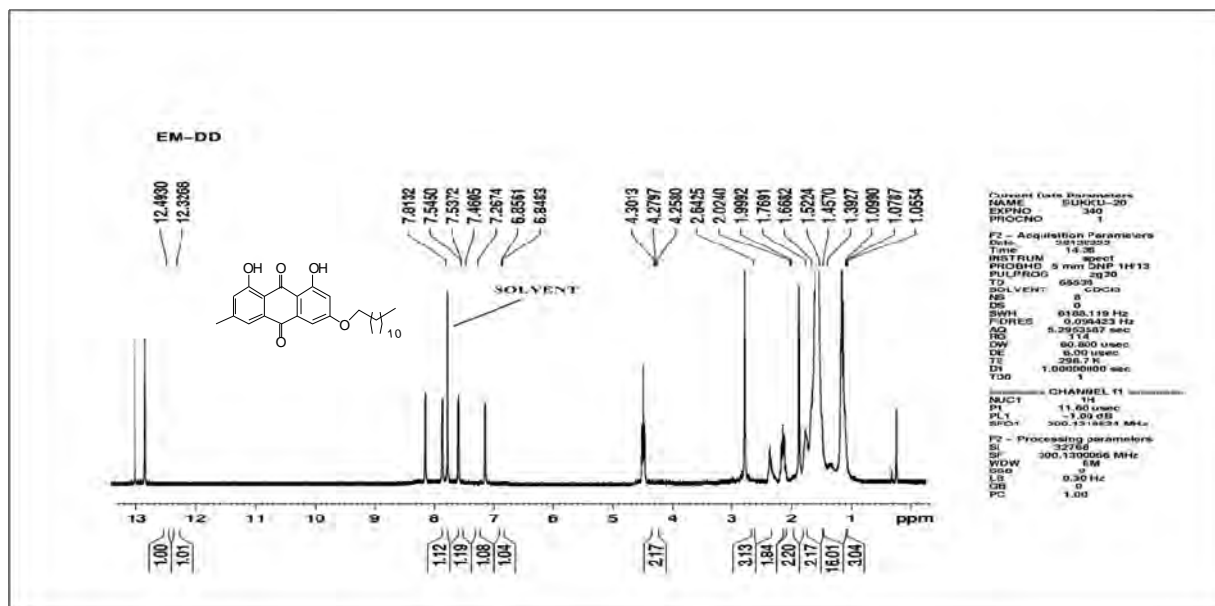

Proton NMR spectrum of compound 3

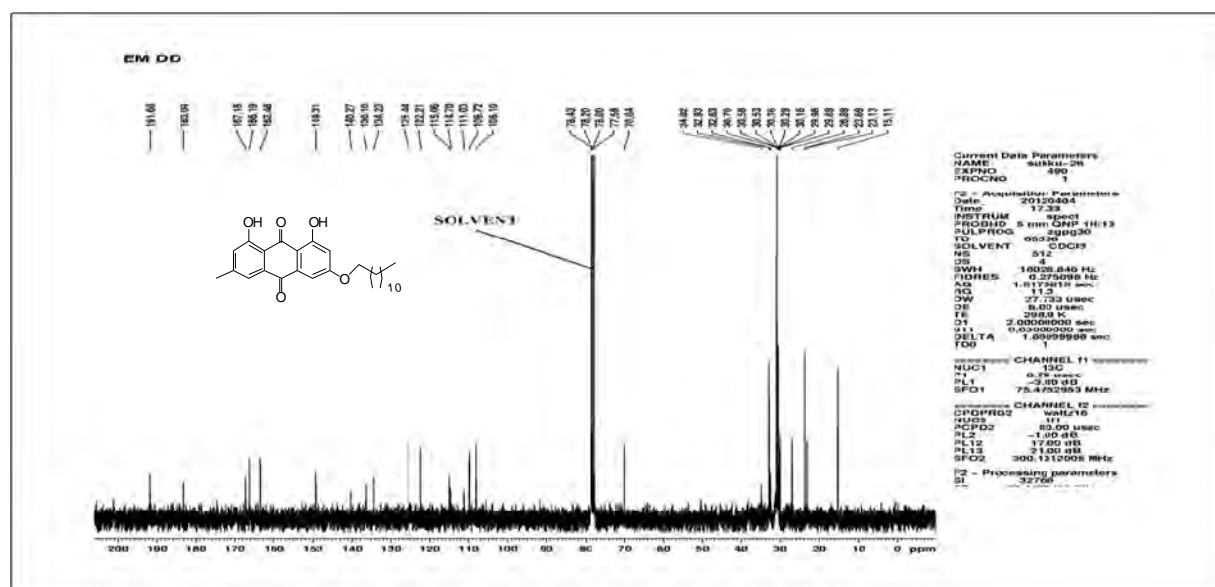

Carbon-13 NMR spectrum of compound 3

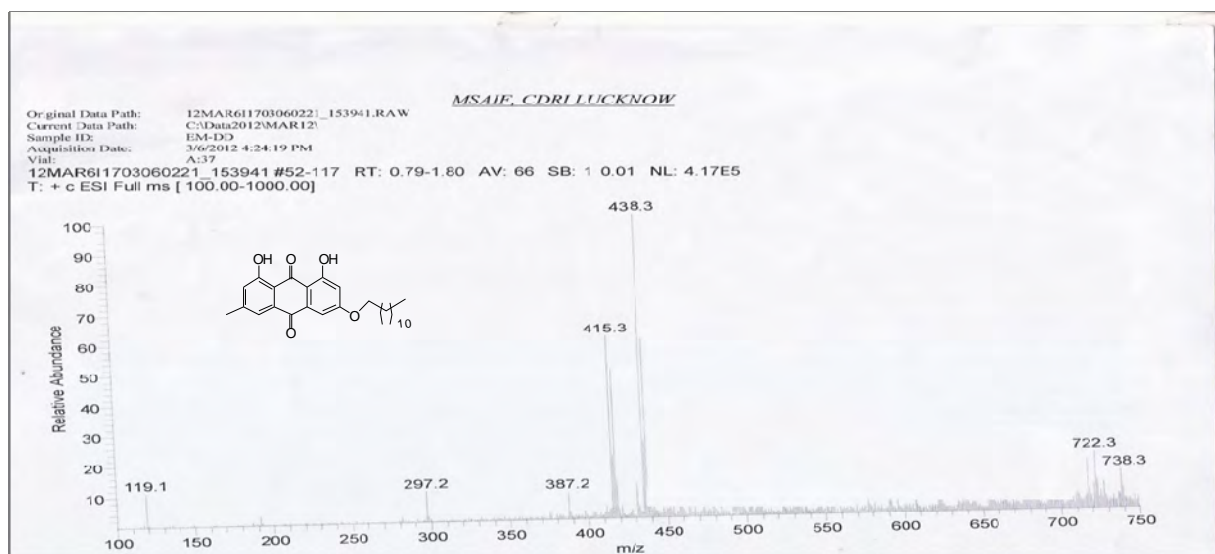

**Mass spectrum of compound 3**

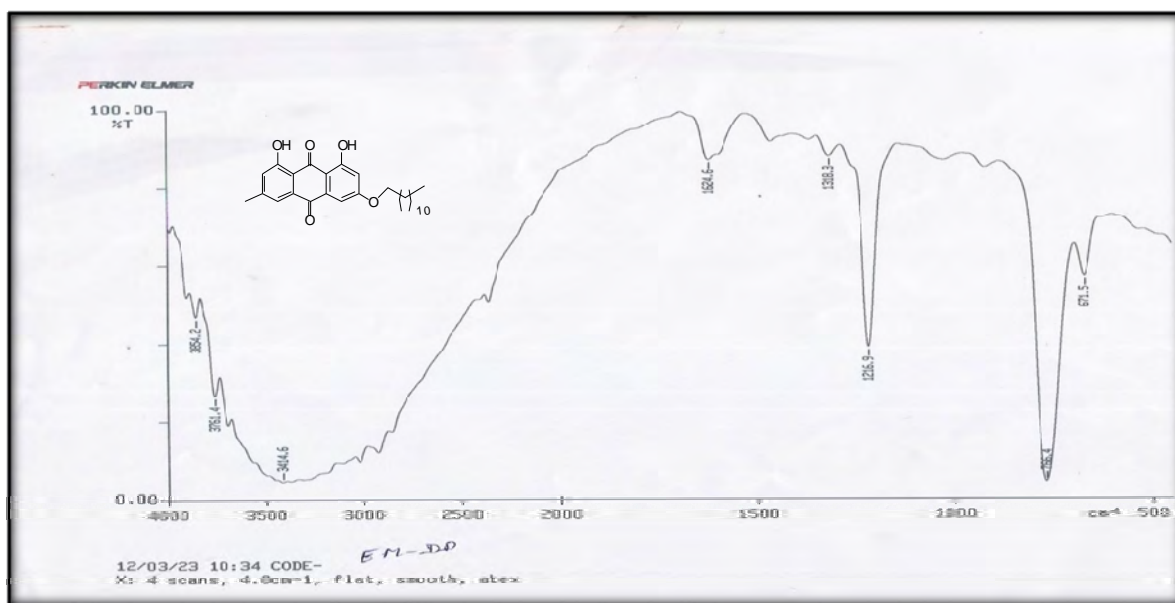

**IR spectrum of compound 3**

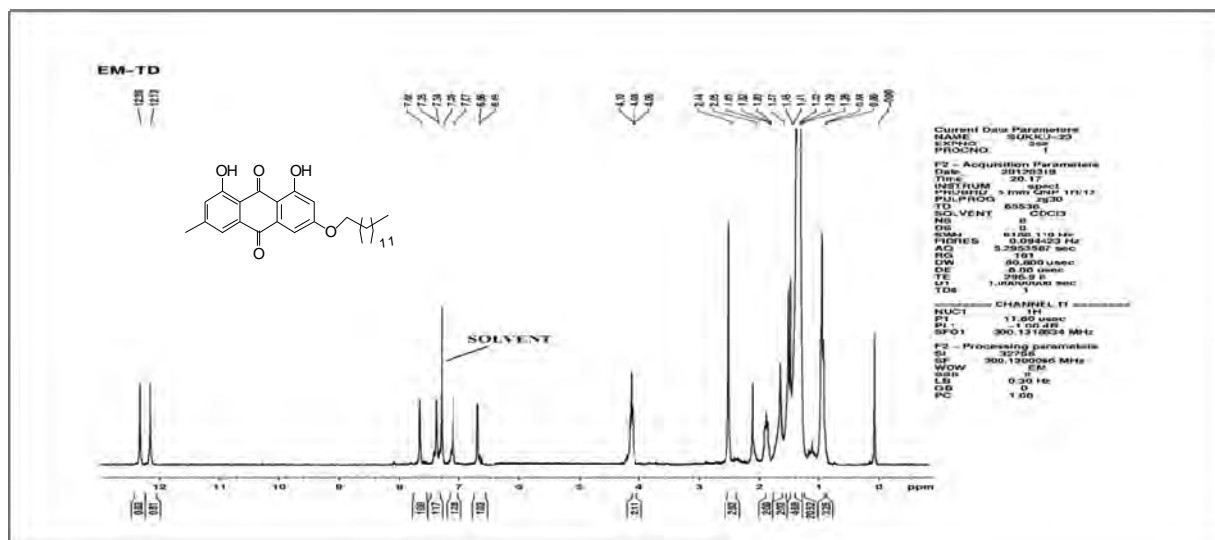

Proton NMR spectrum of compound 4

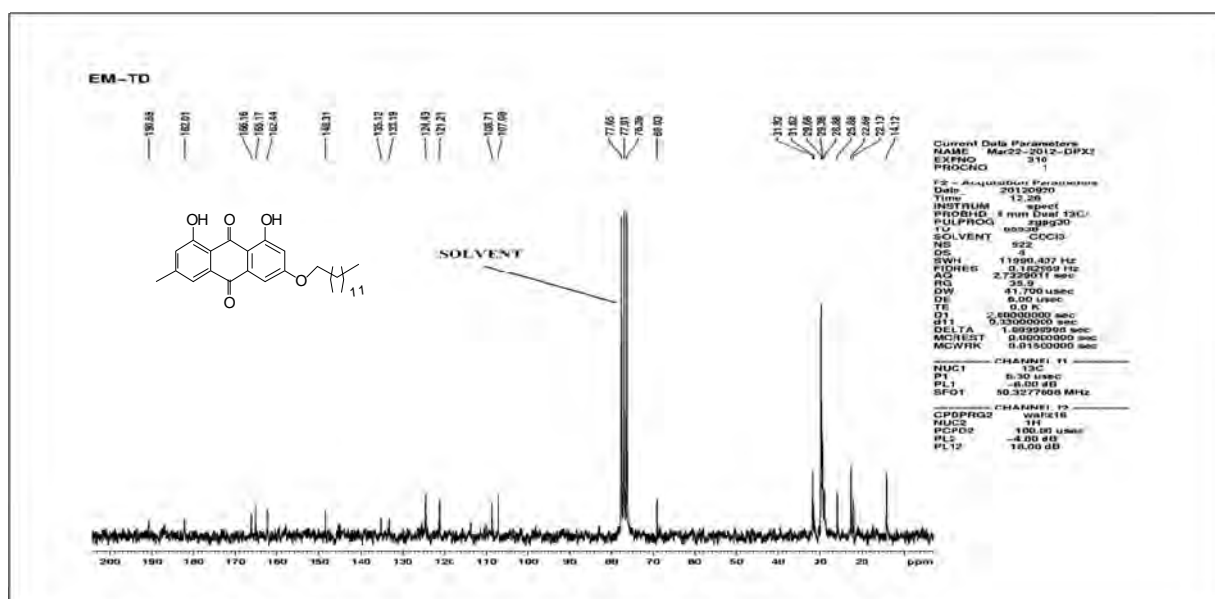

Carbon-13 NMR spectrum of compound 4

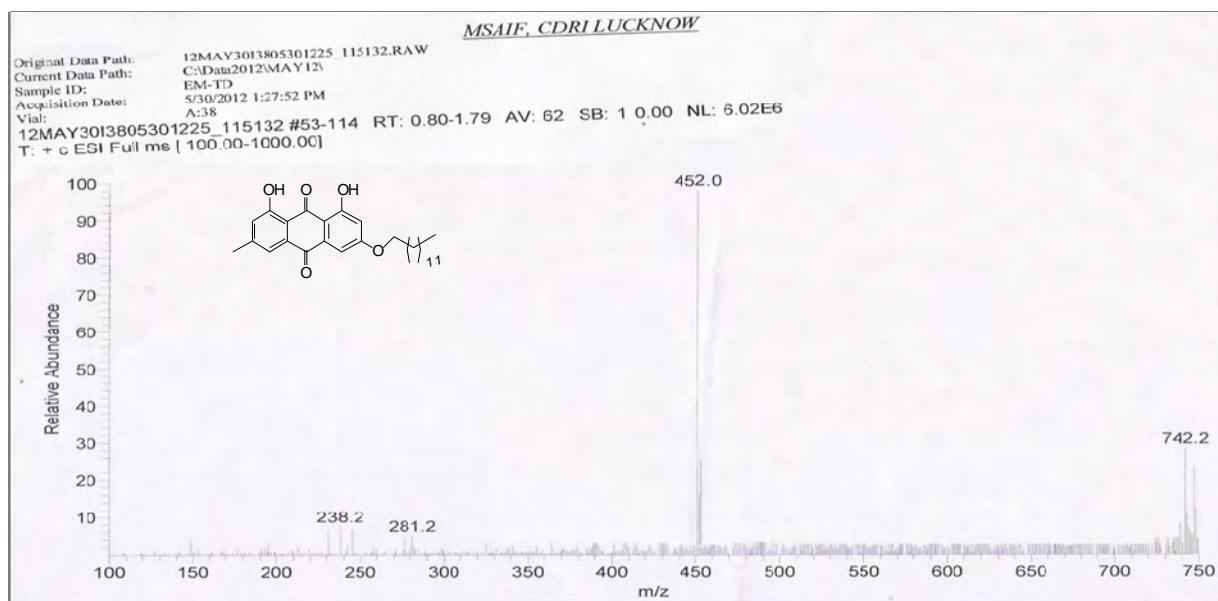

**Mass spectrum of compound 4**

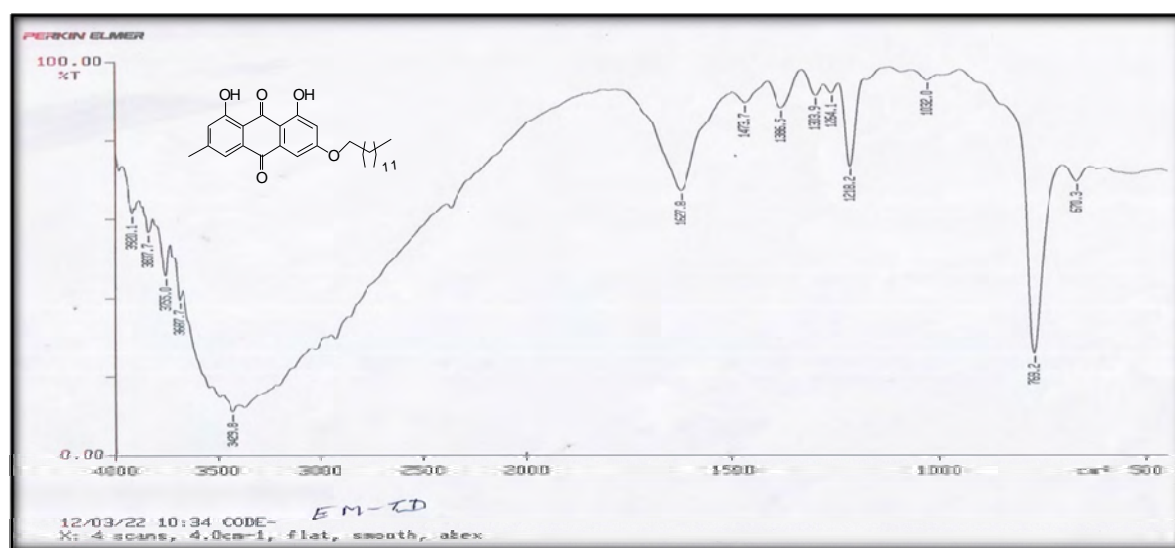

**IR spectrum of compound 4**



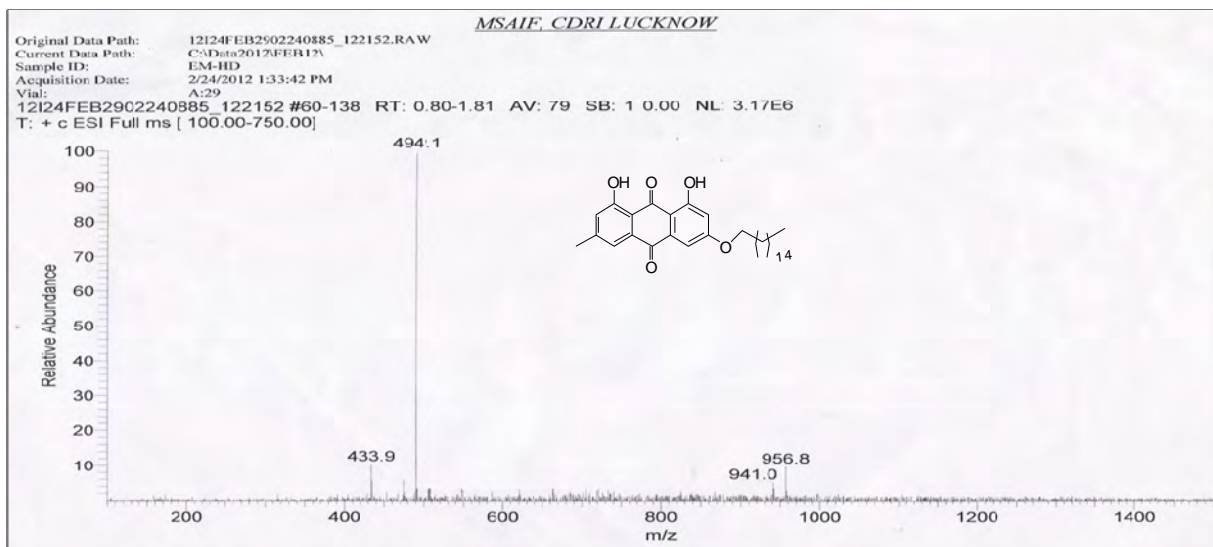

Mass spectrum of compound 5

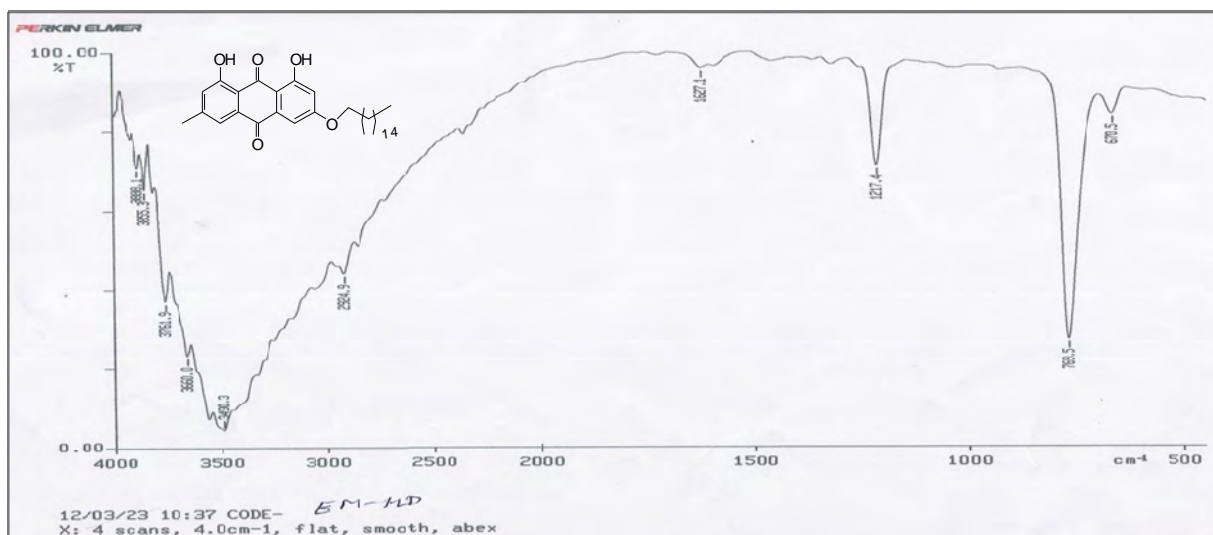

IR spectrum of compound 5

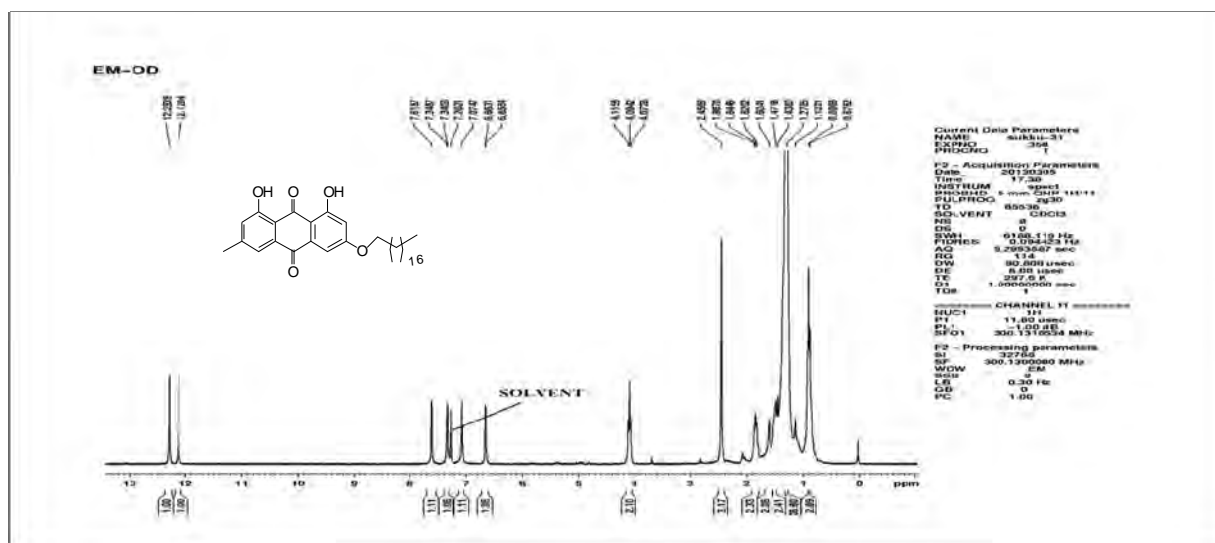

Proton NMR spectrum of compound 6

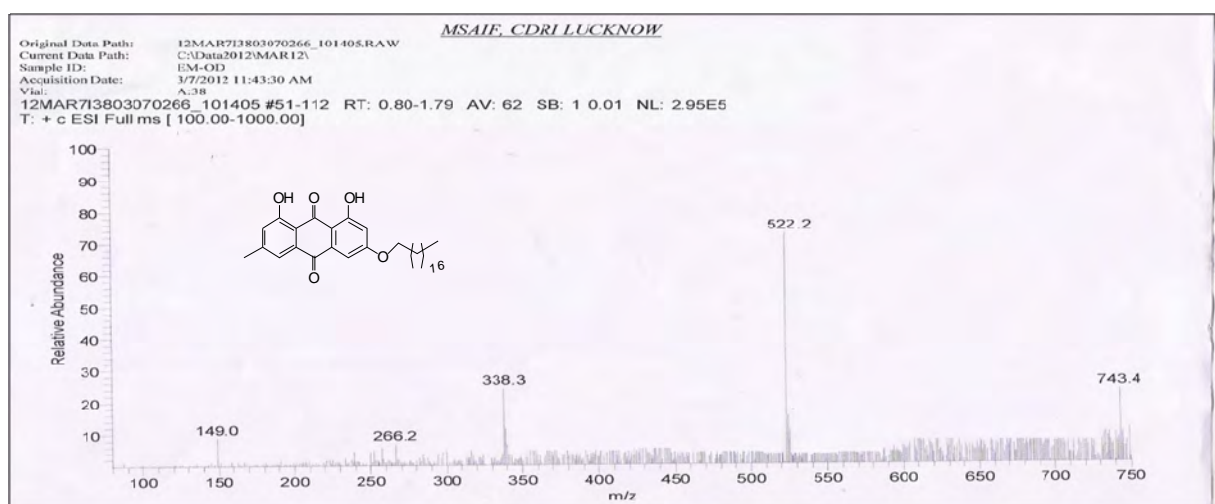

Mass spectrum of compound 6



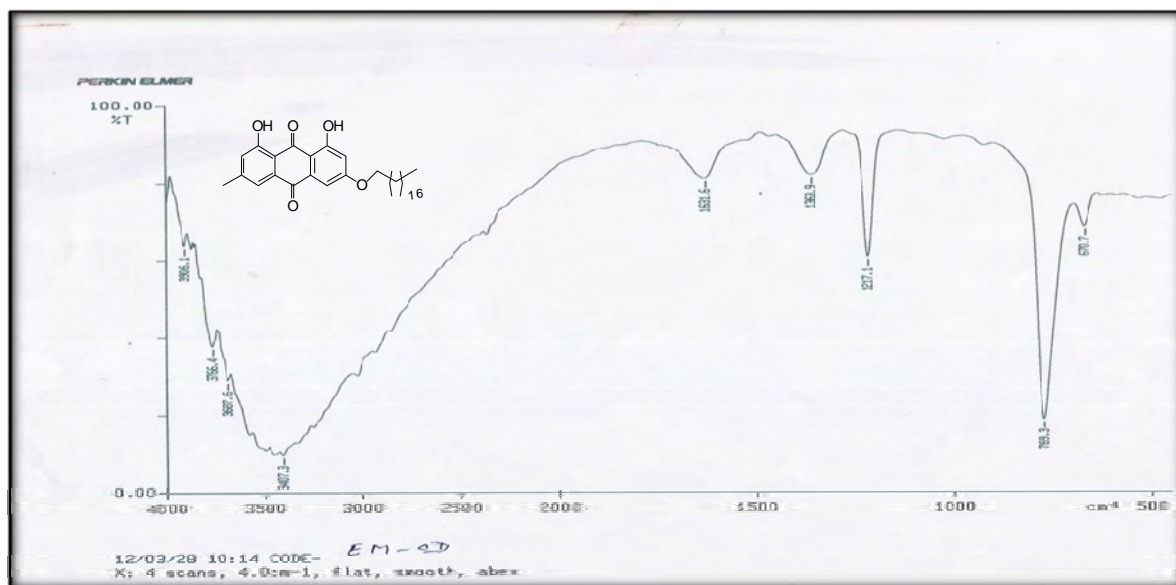

IR spectrum of compound 6

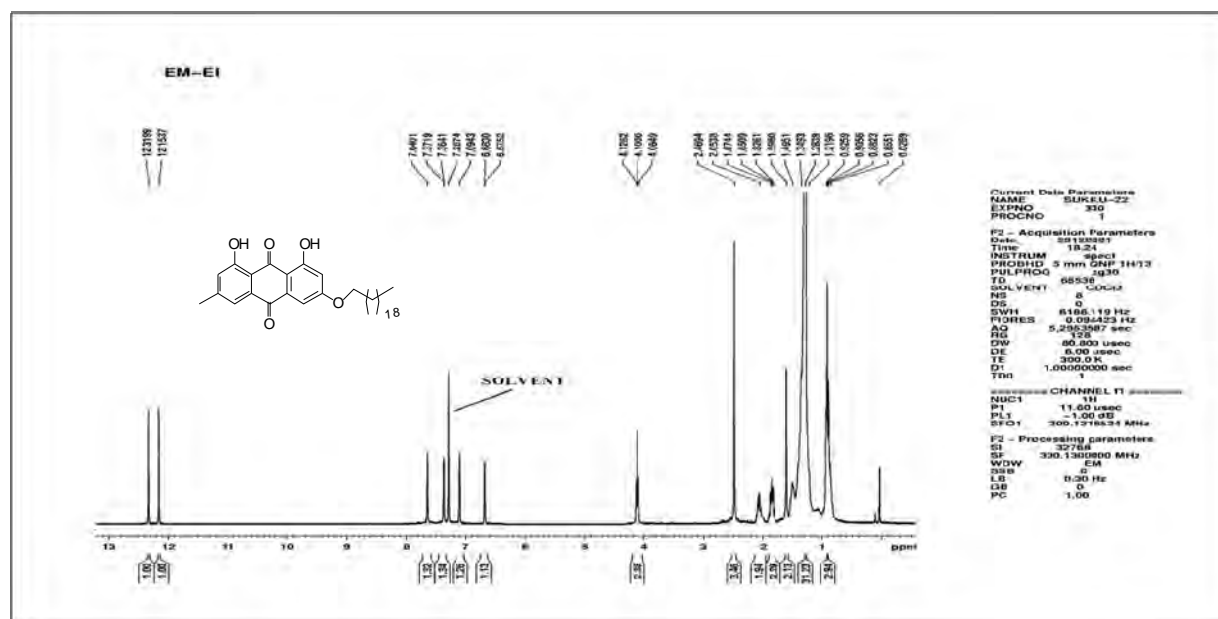

Proton NMR spectrum of compound 7

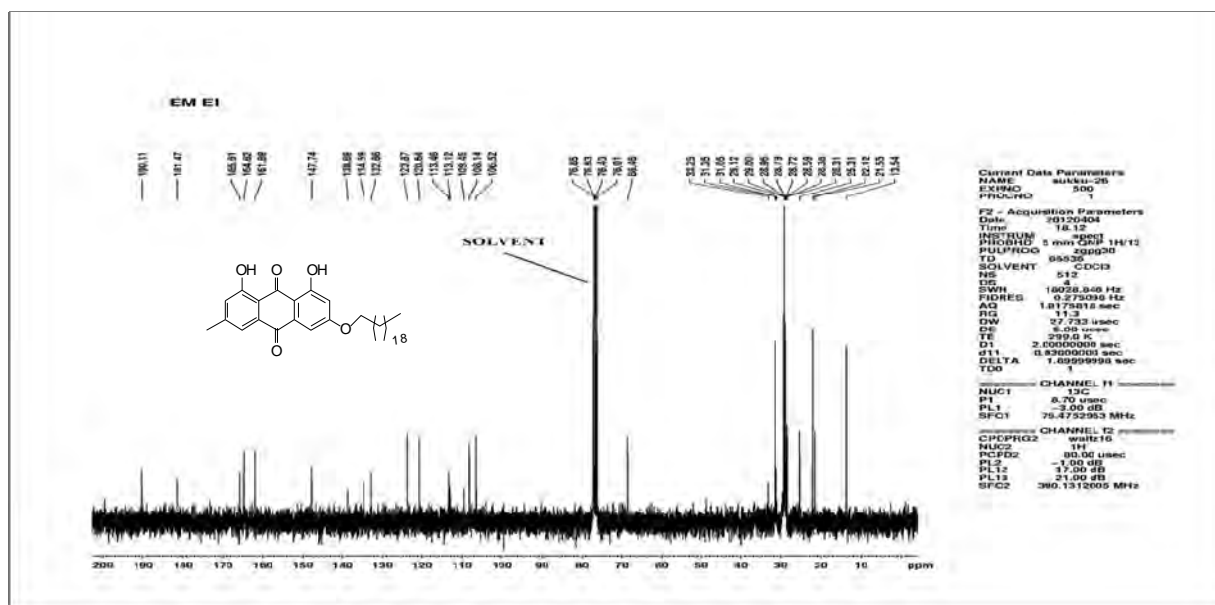

Carbon-13 NMR spectrum of compound 7

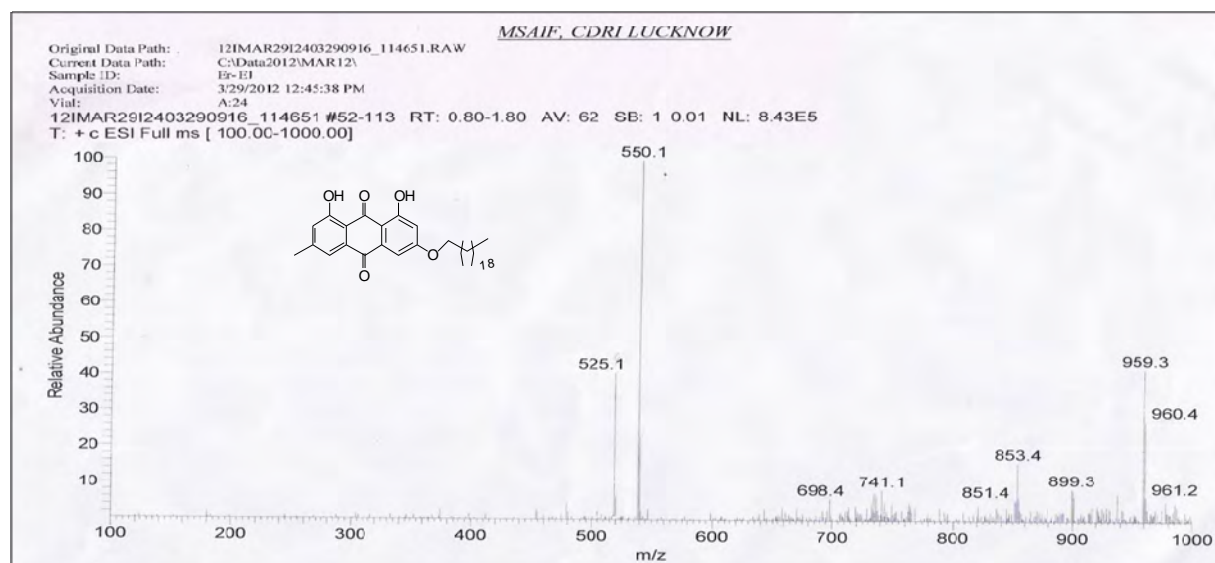

Mass spectrum of compound 7

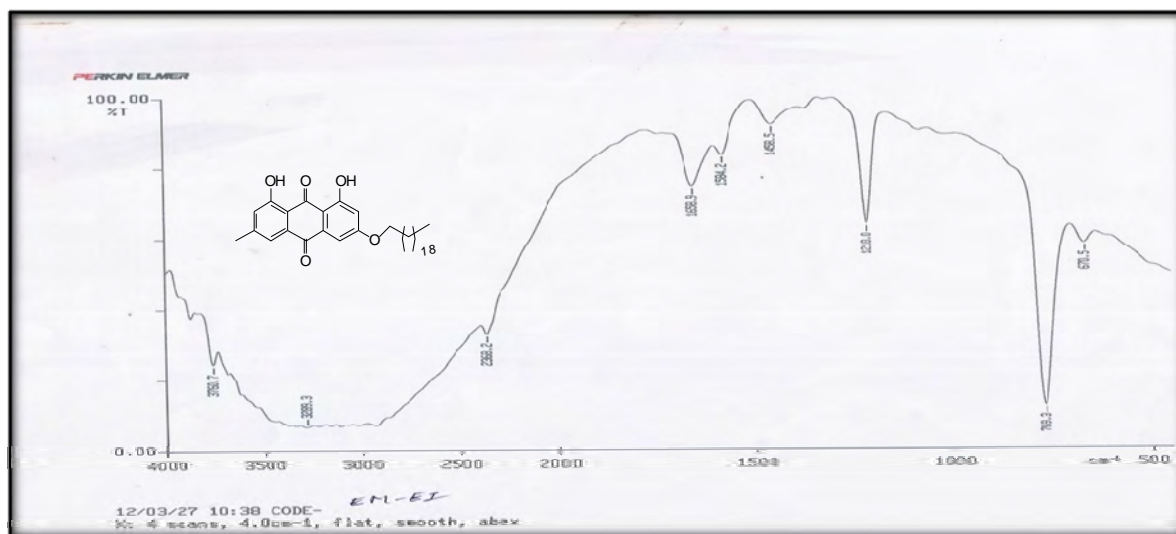

IR spectrum of compound 7

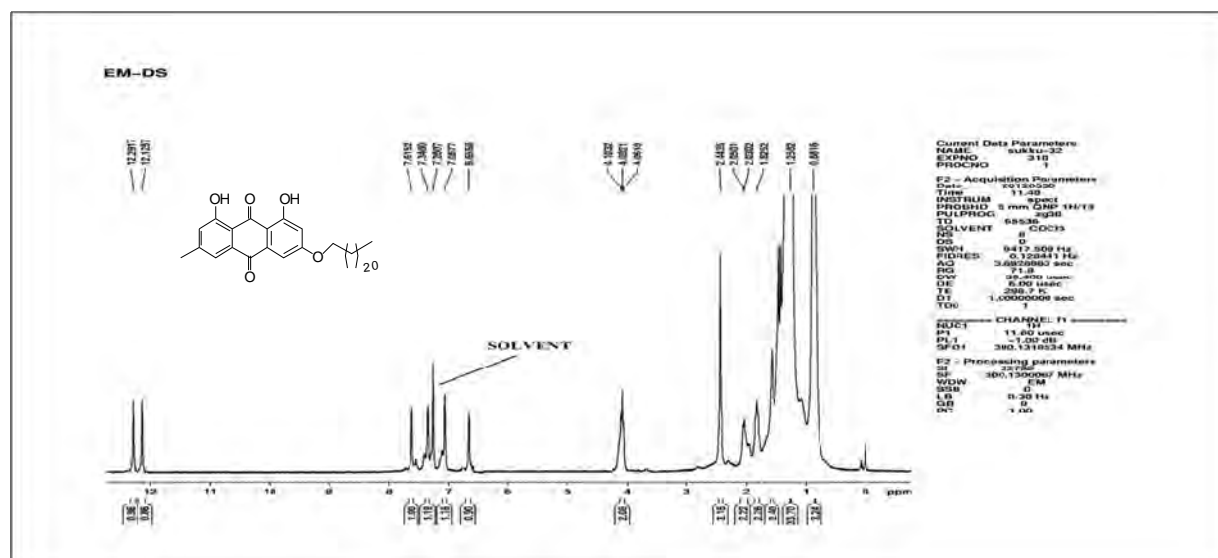

Proton NMR spectrum of compound 8

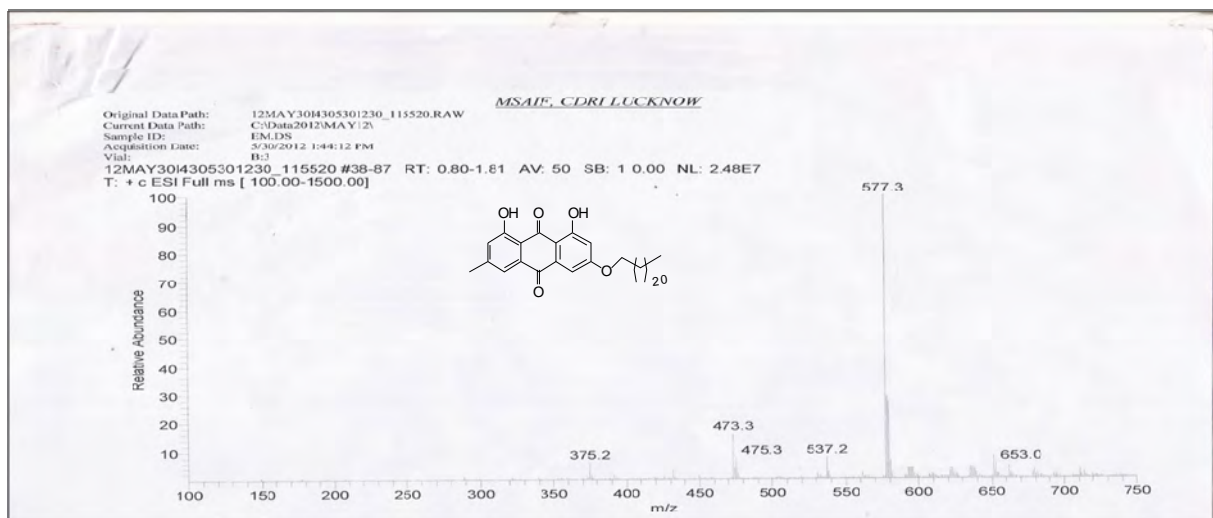

Mass spectrum of compound 8

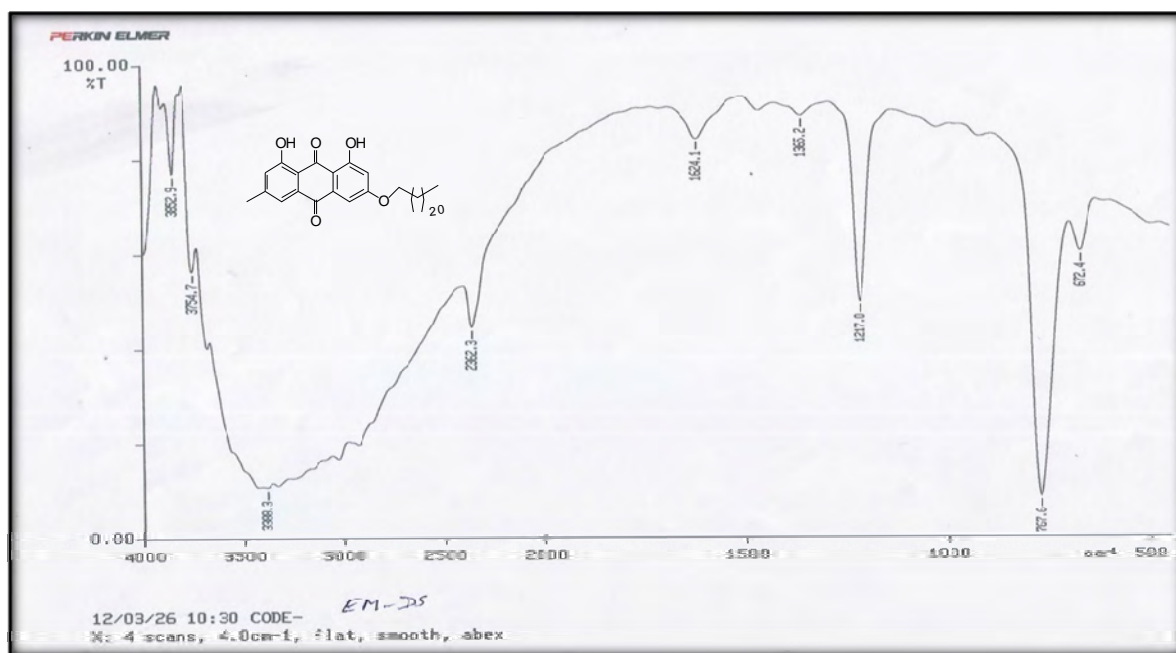

IR spectrum of compound 8



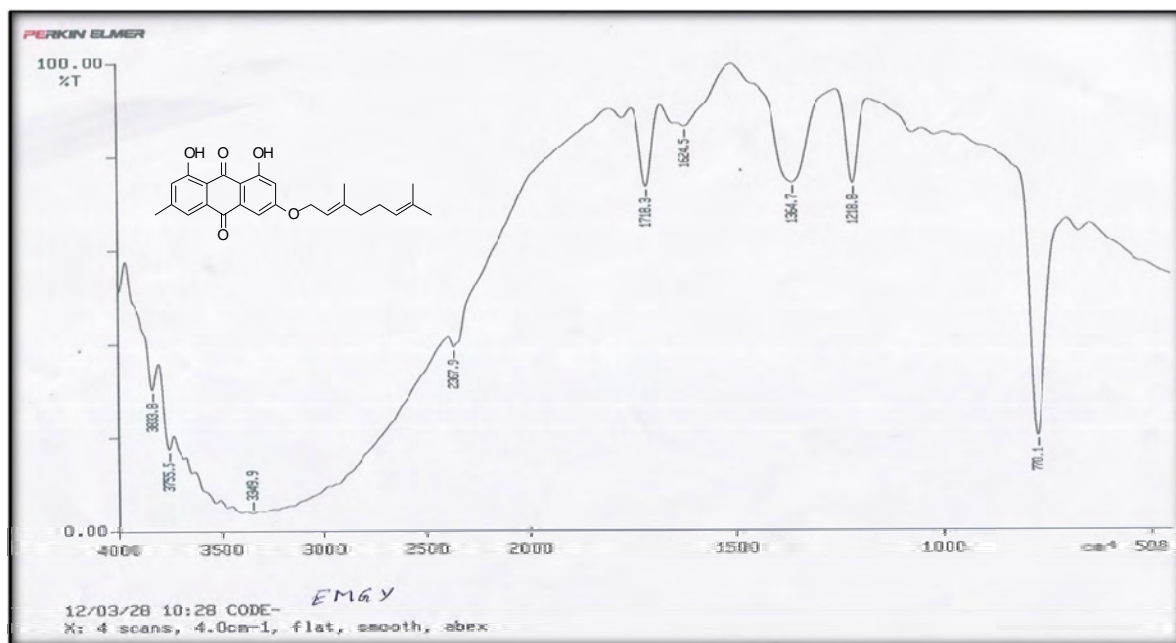

IR spectrum of compound 9

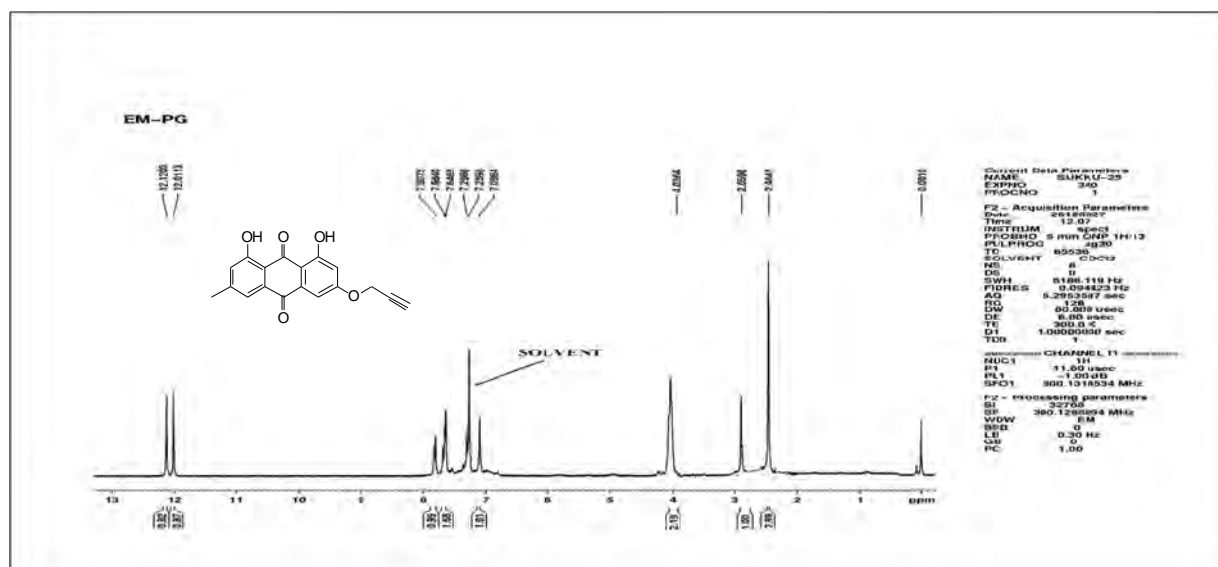

Proton NMR spectrum of compound 10

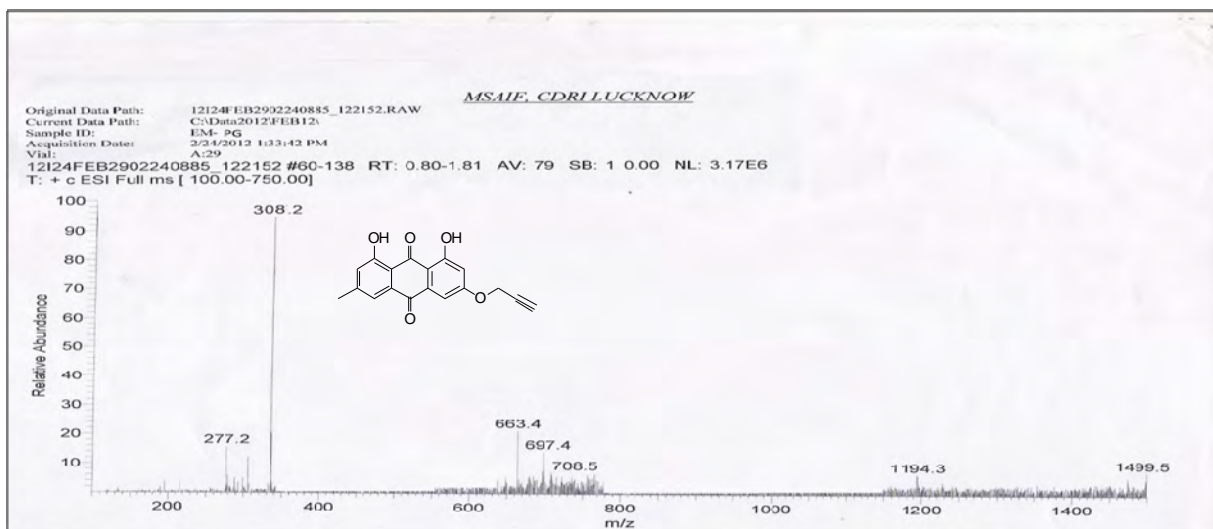

Mass spectrum of compound 10

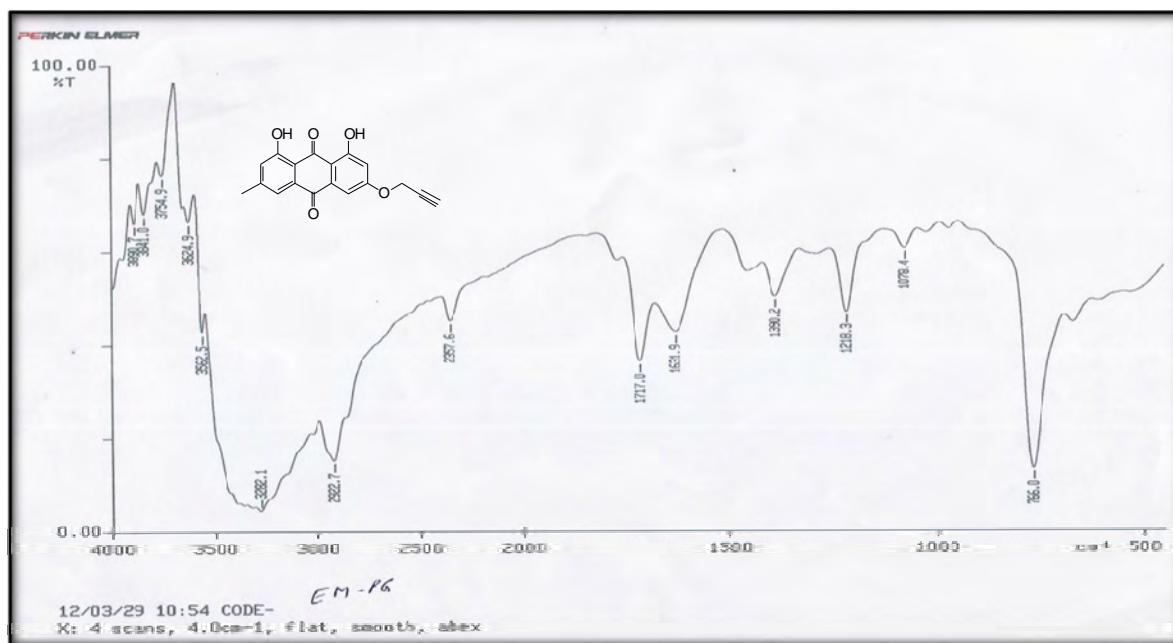

IR spectrum of compound 10

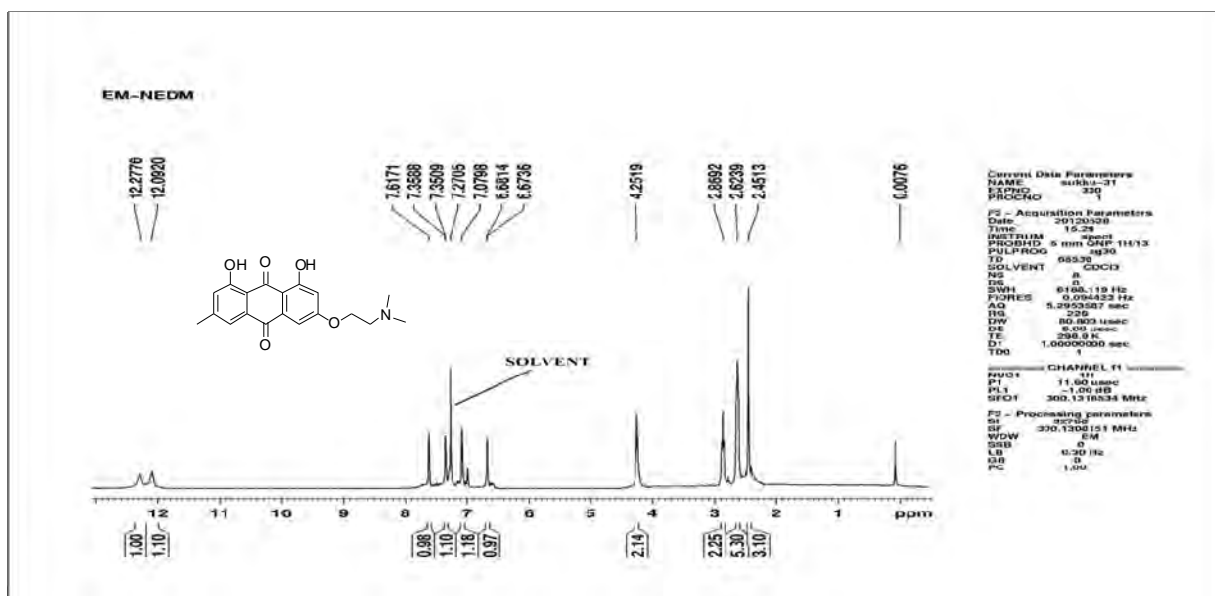

Proton NMR spectrum of compound 11

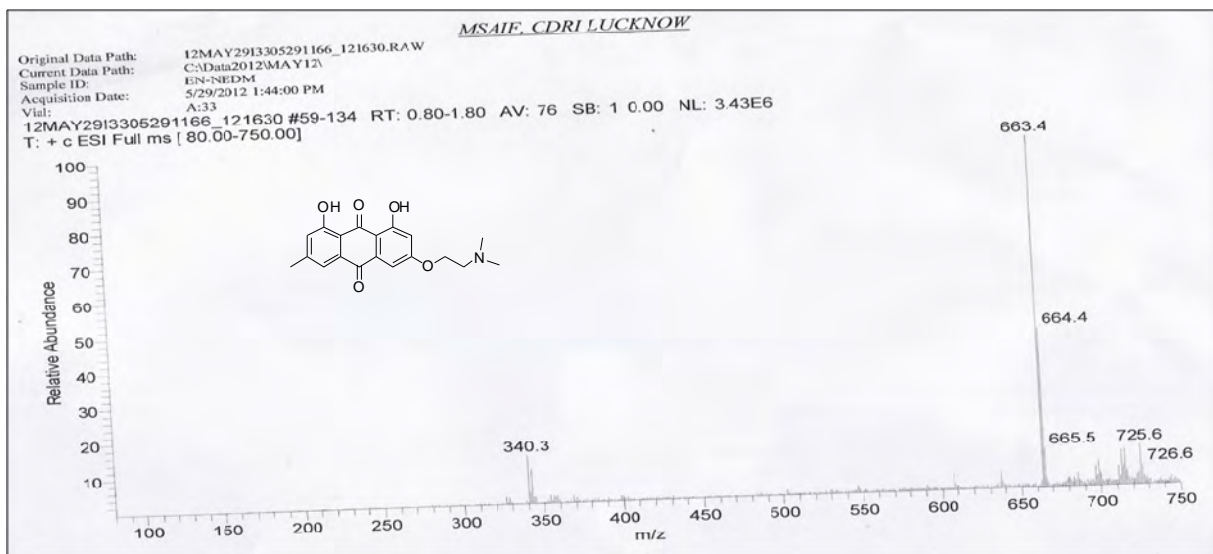

Mass spectrum of compound 11



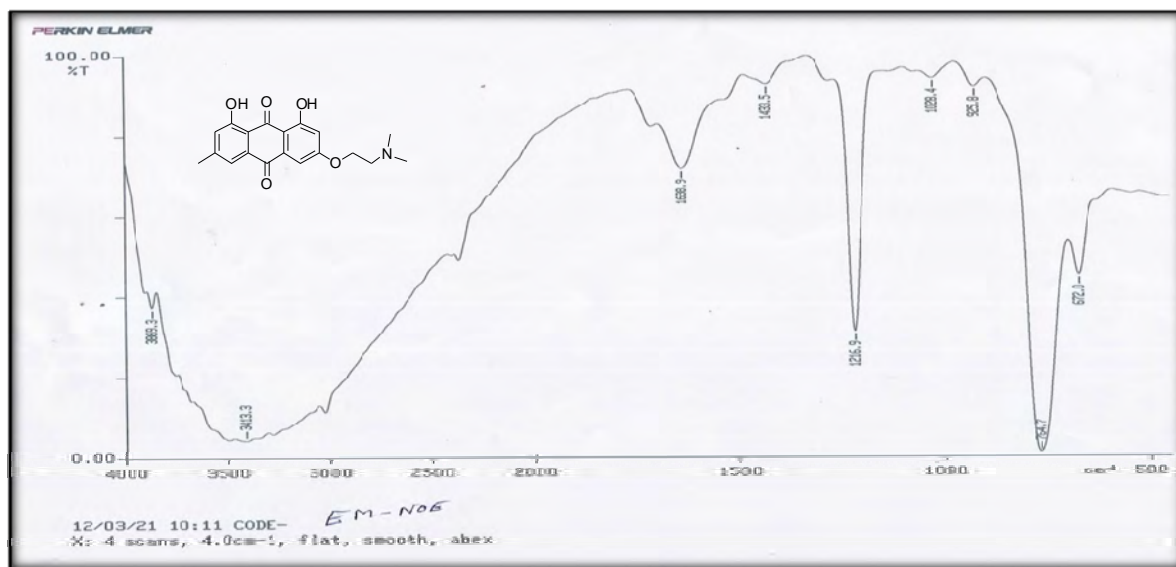

IR spectrum of compound 11

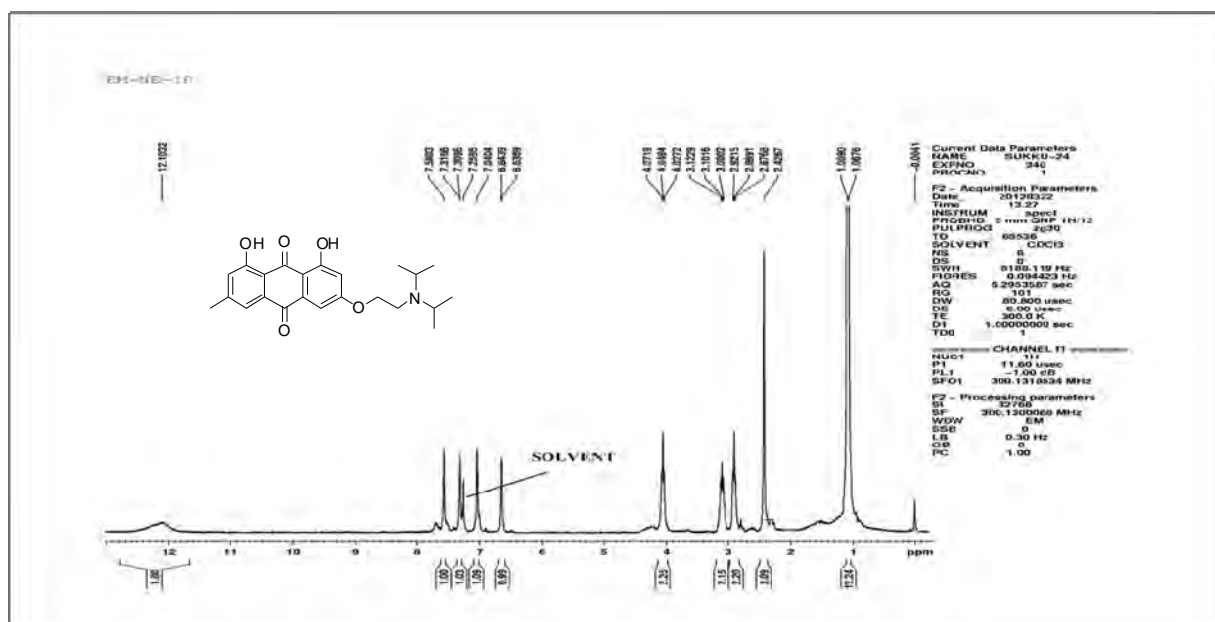

Proton NMR spectrum of compound 12

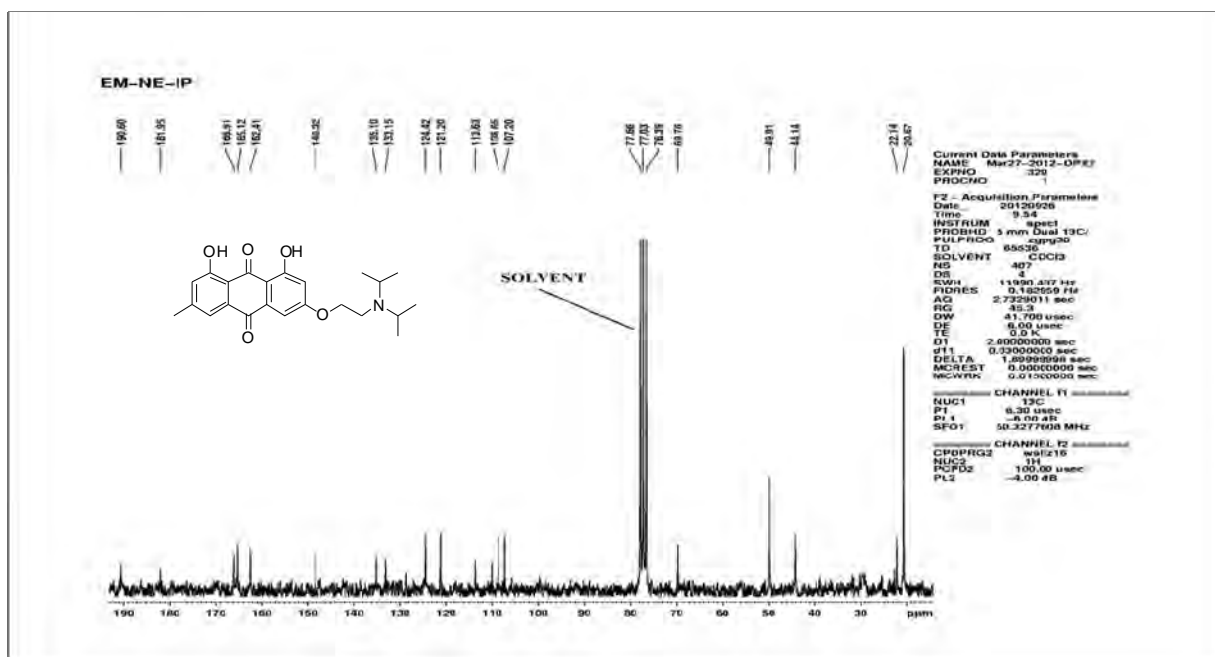

Carbon-13 NMR spectrum of compound 12

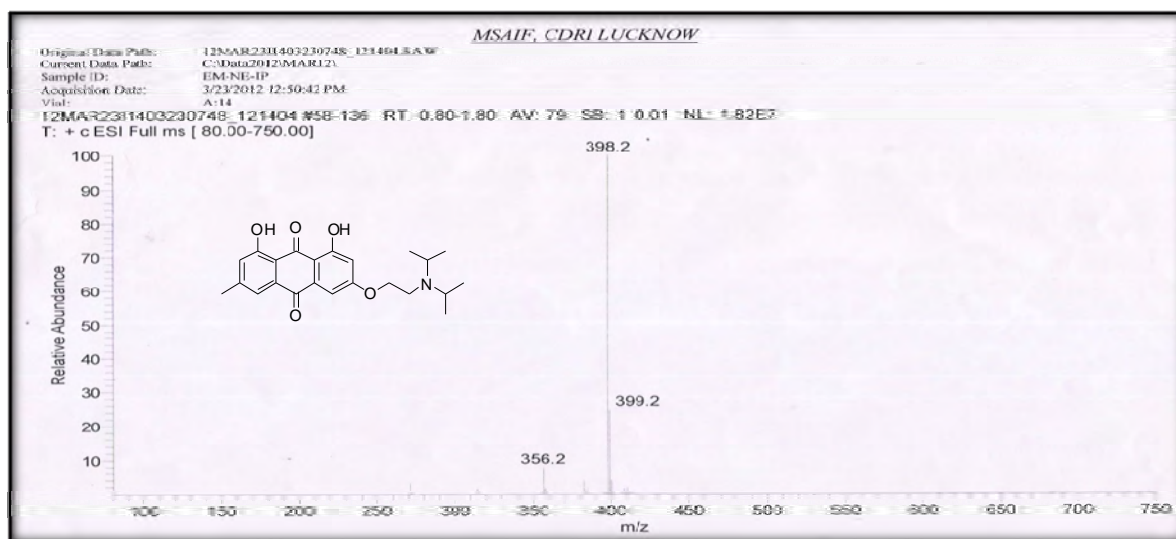

Mass spectrum of compound 12

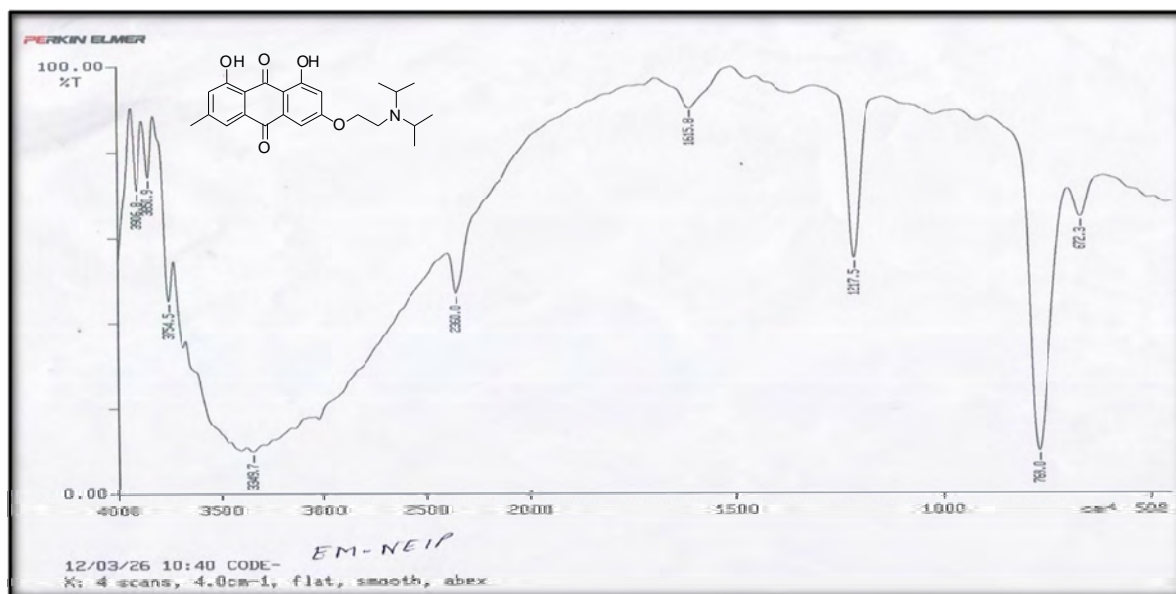

IR spectrum of compound 12

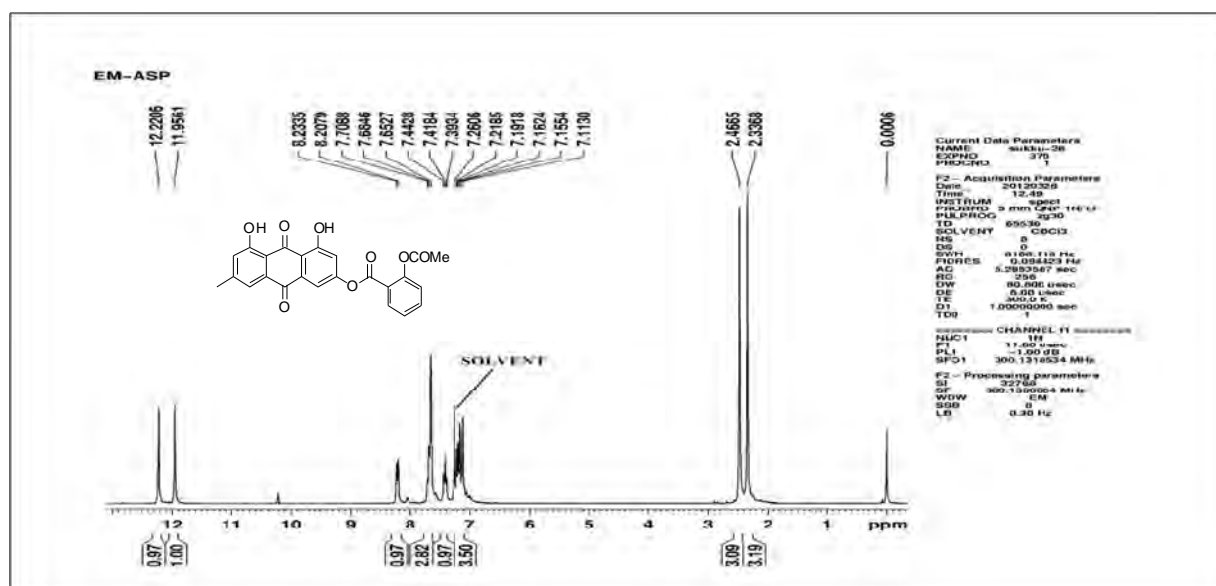

Proton NMR spectrum of compound 13

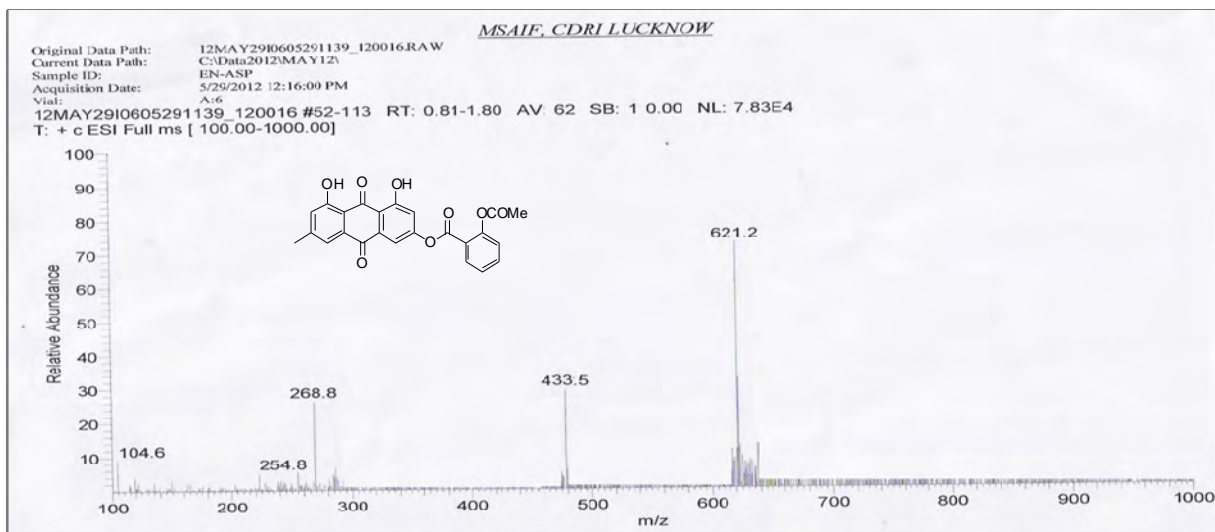

**Mass spectrum of compound 13**

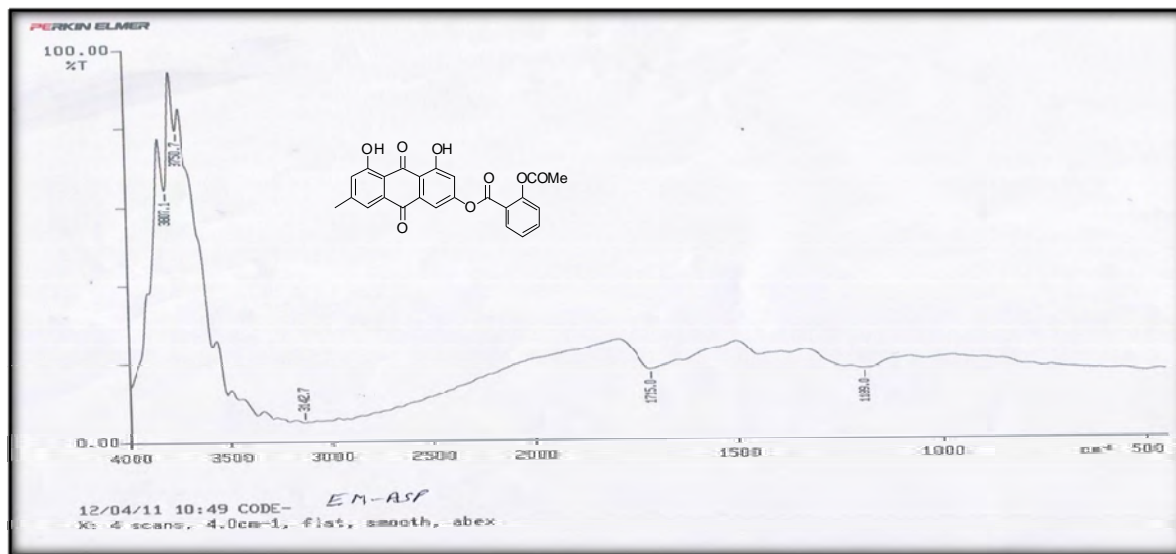

**IR spectrum of compound 13**

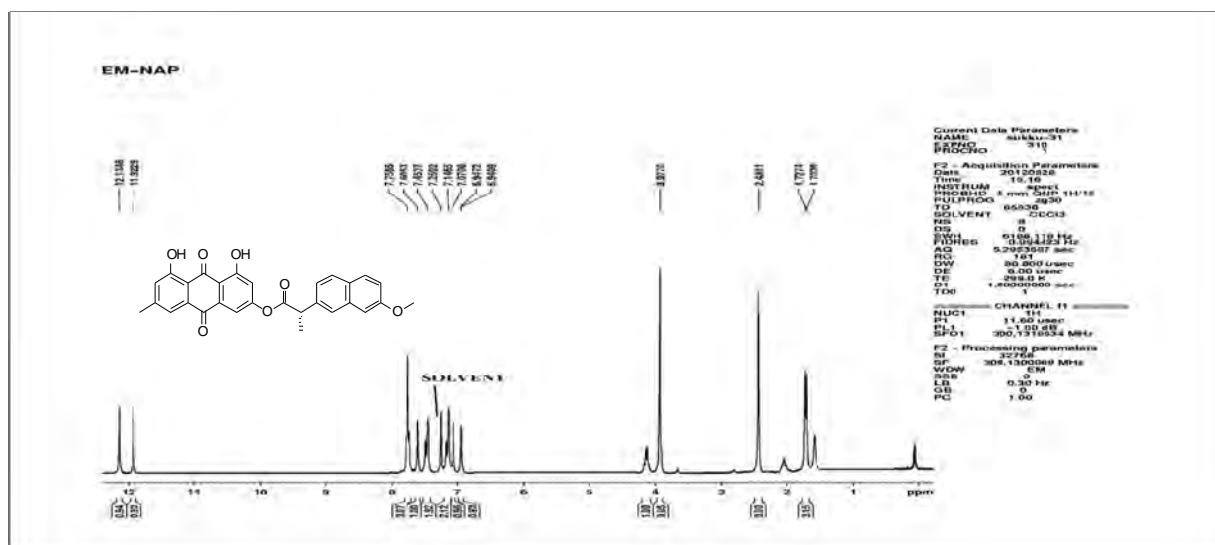

**Proton NMR spectrum of compound 14**

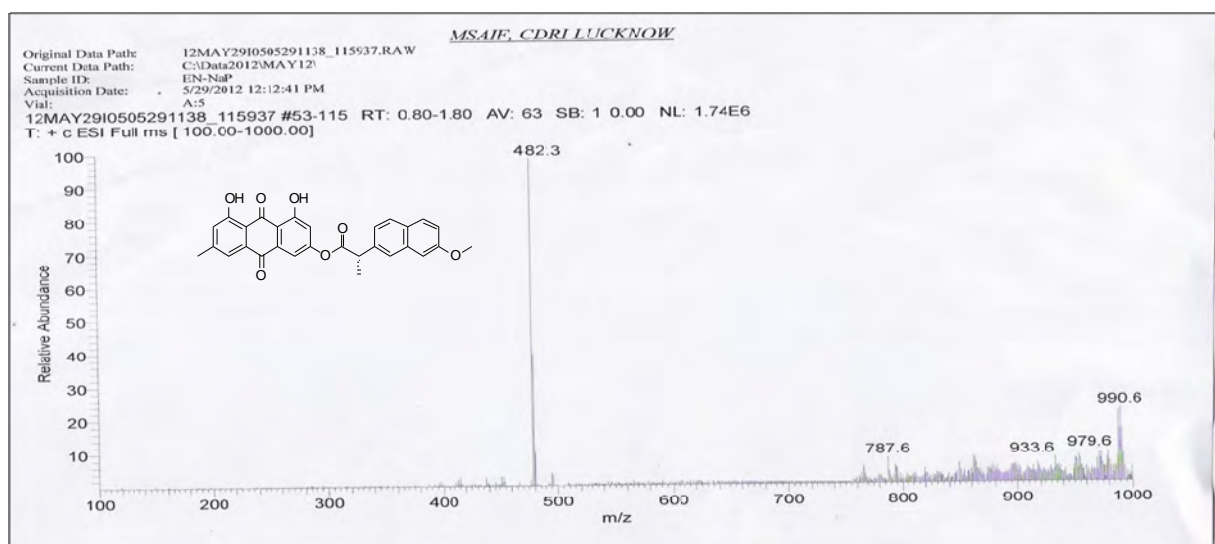

**Mass spectrum of compound 14**

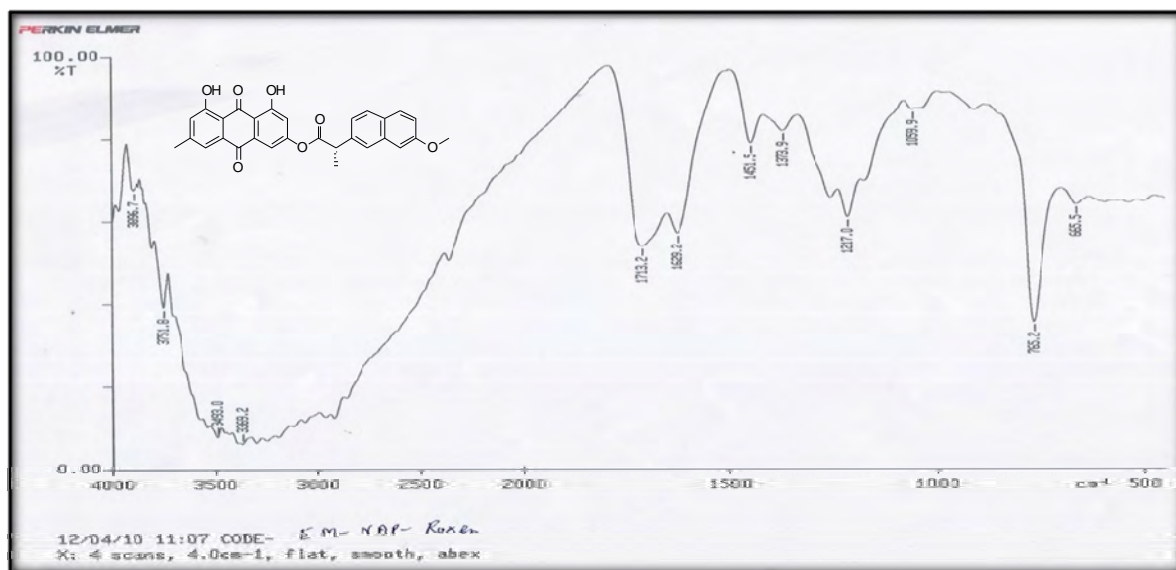

IR spectrum of compound 14

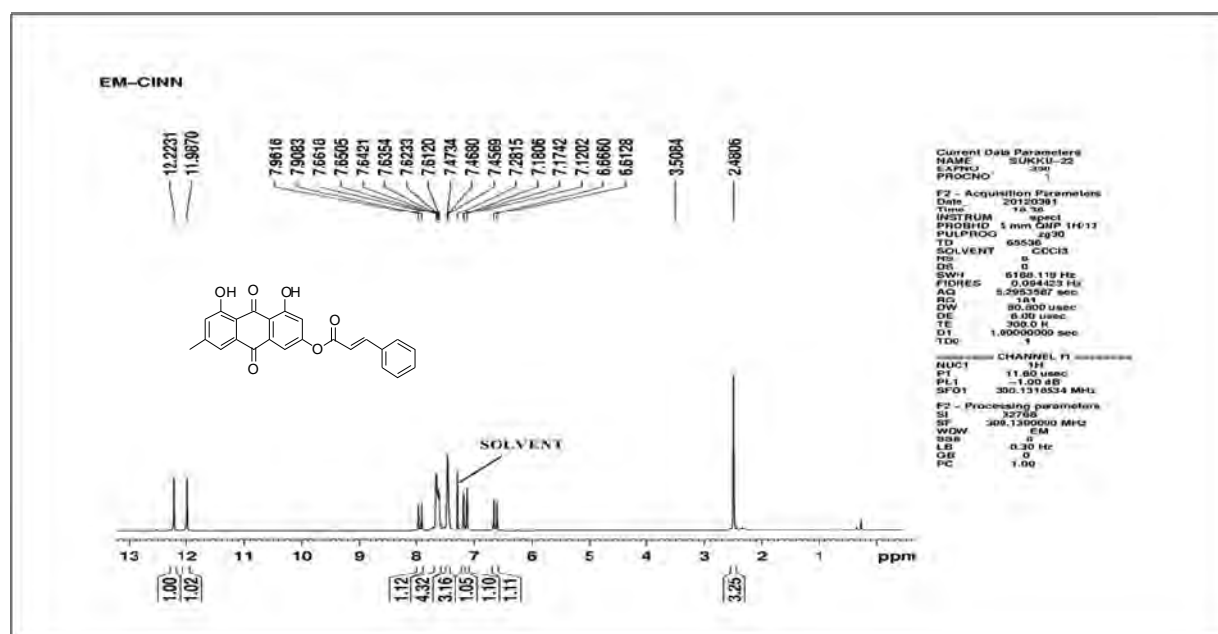

Proton NMR spectrum of compound 15

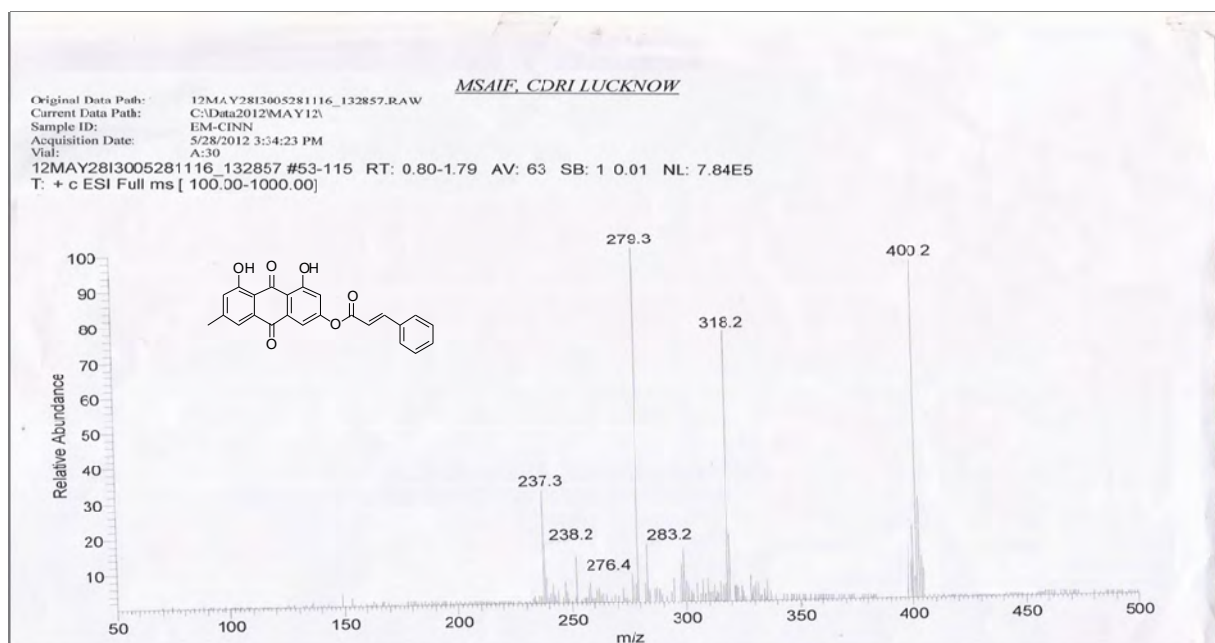

**Mass spectrum of compound 15**

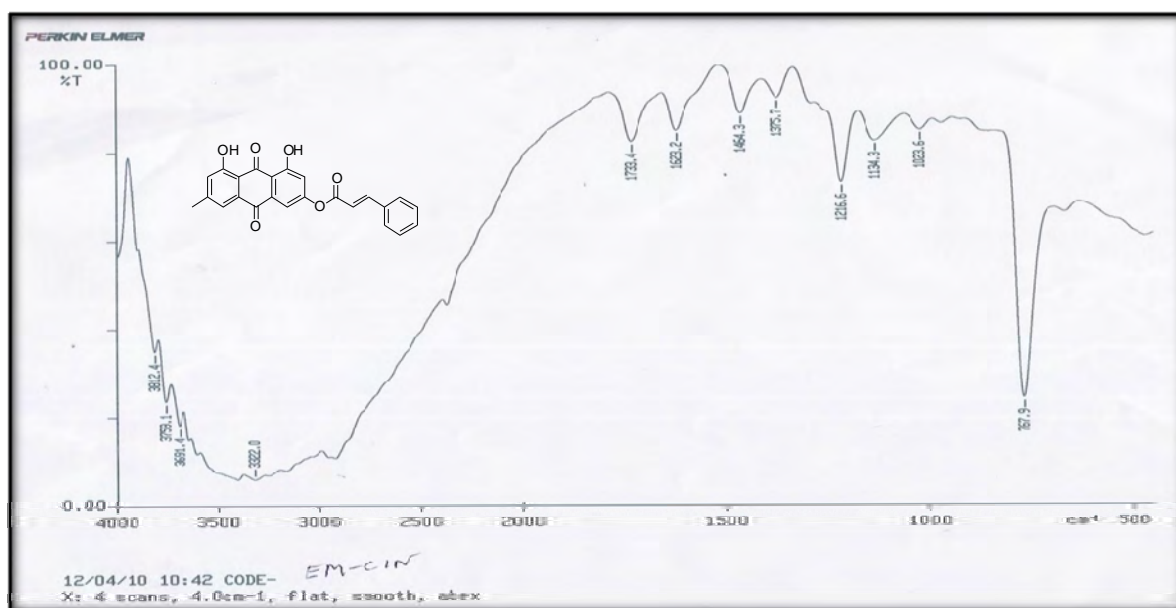

**IR spectrum of compound 15**

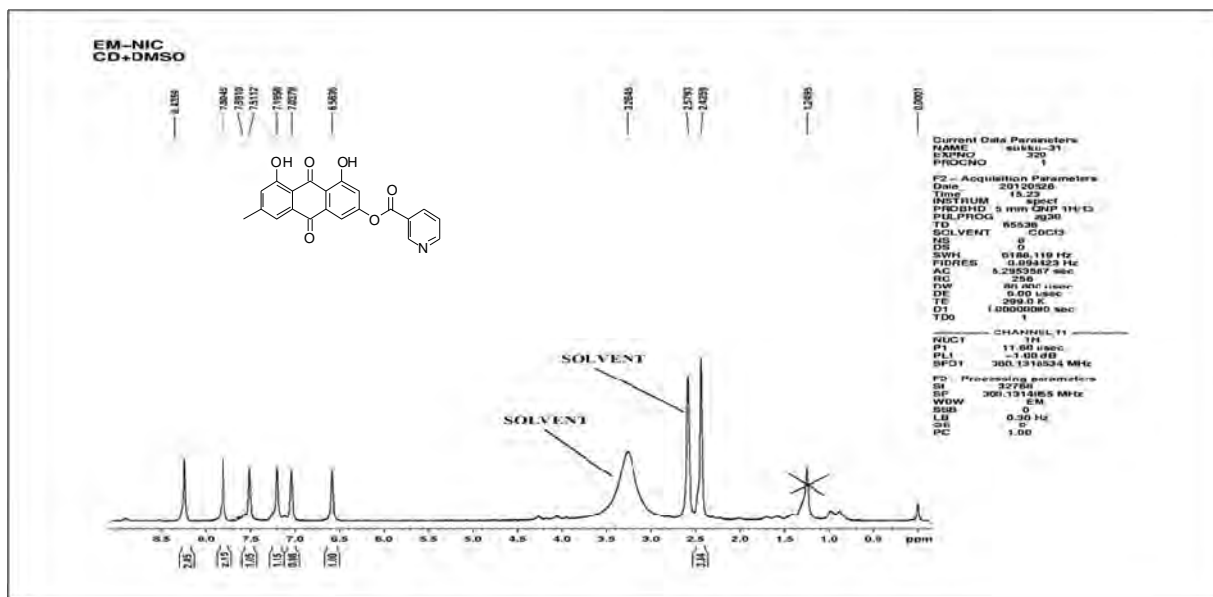

### Proton NMR spectrum of compound 16

X= Indicates grease impurities in the spectrum

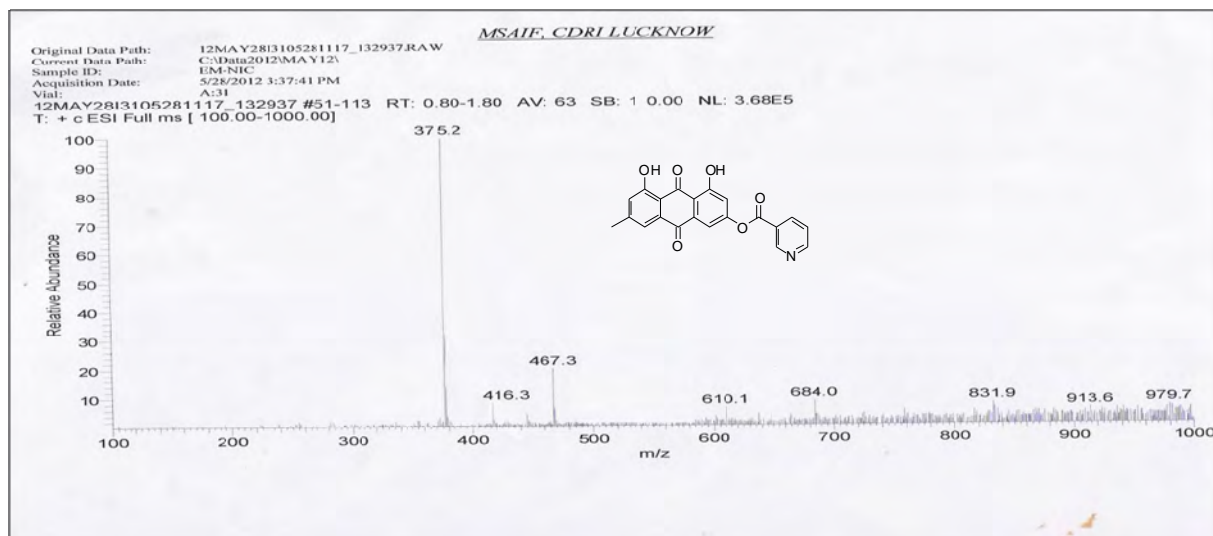

### Mass spectrum of compound 16



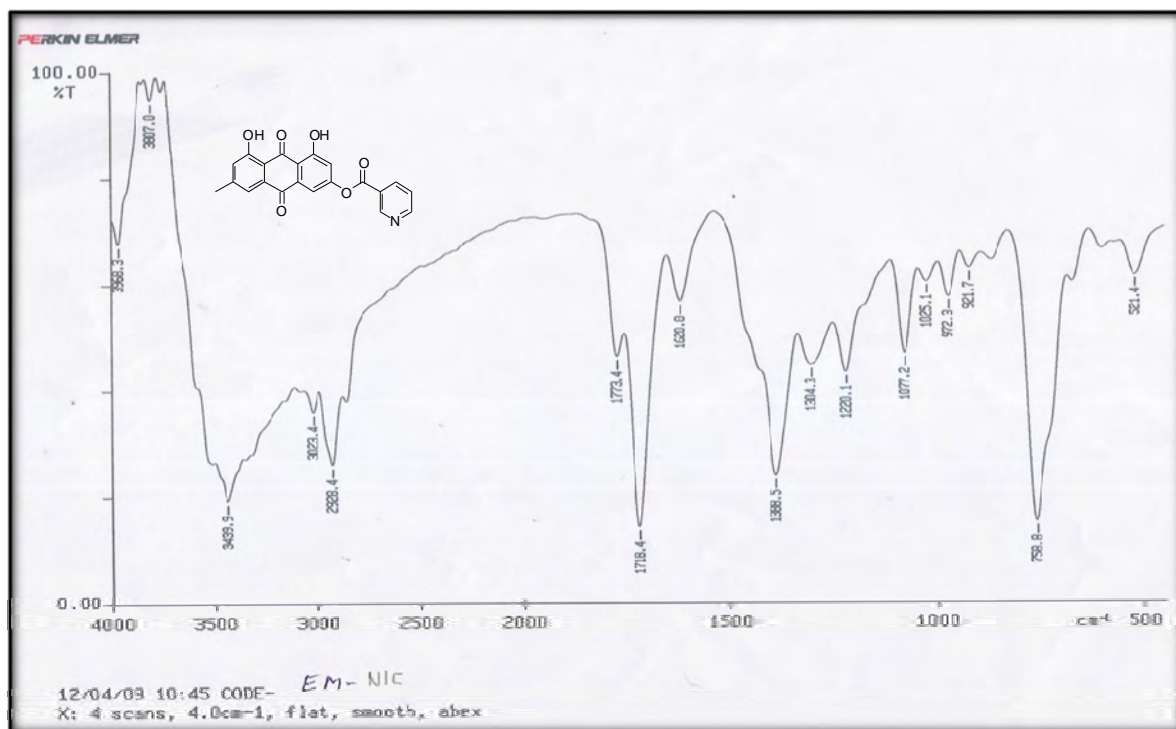

IR spectrum of compound 16

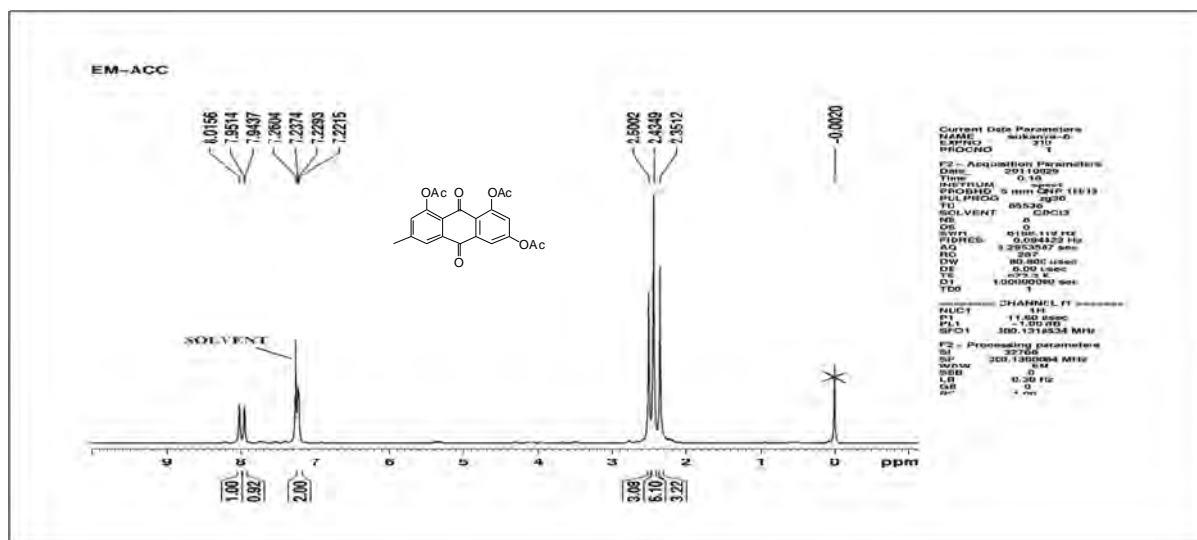

Proton NMR spectrum of compound 17

X= Indicates grease impurities in the spectrum

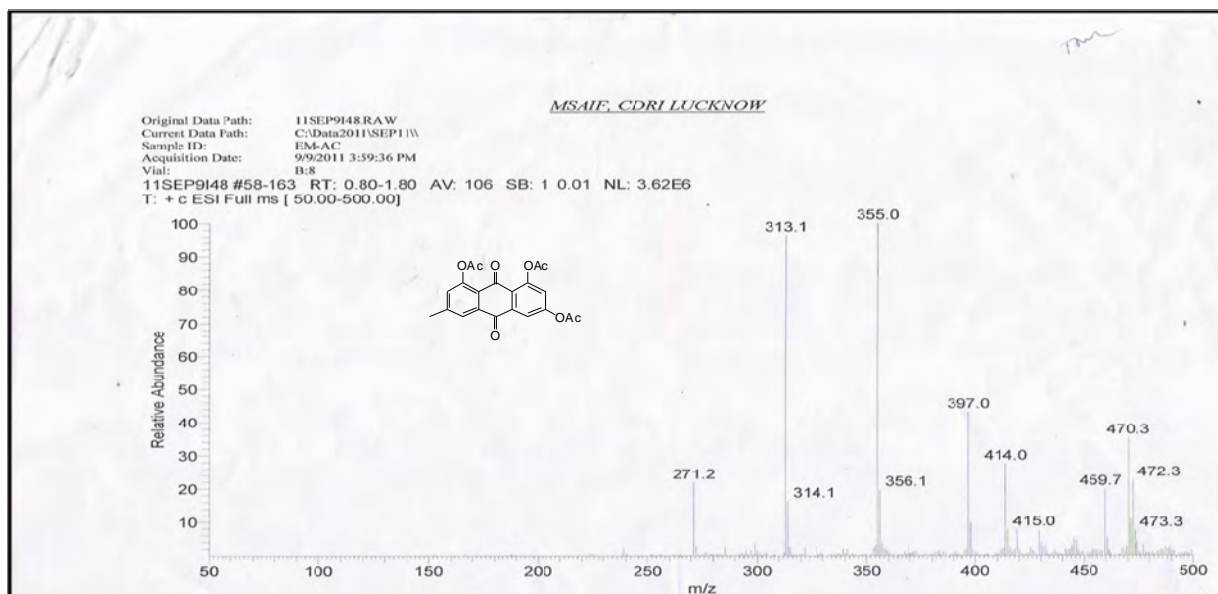

Mass spectrum of compound 17

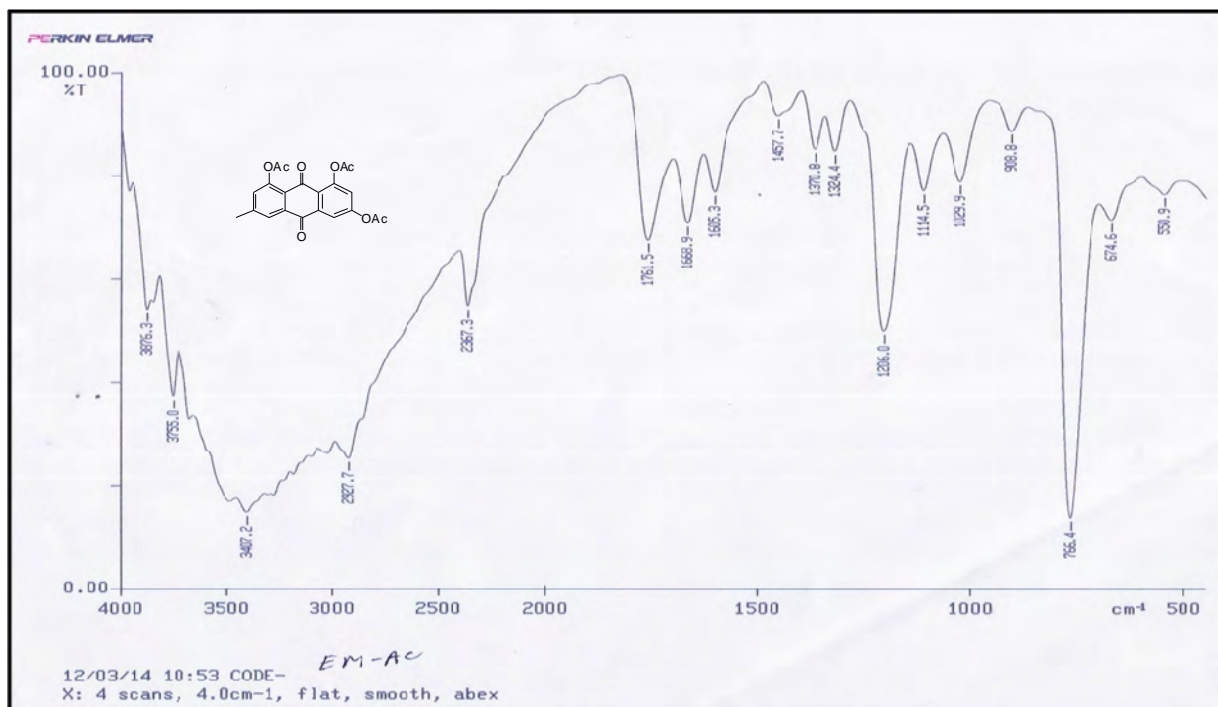

IR spectrum of compound 17

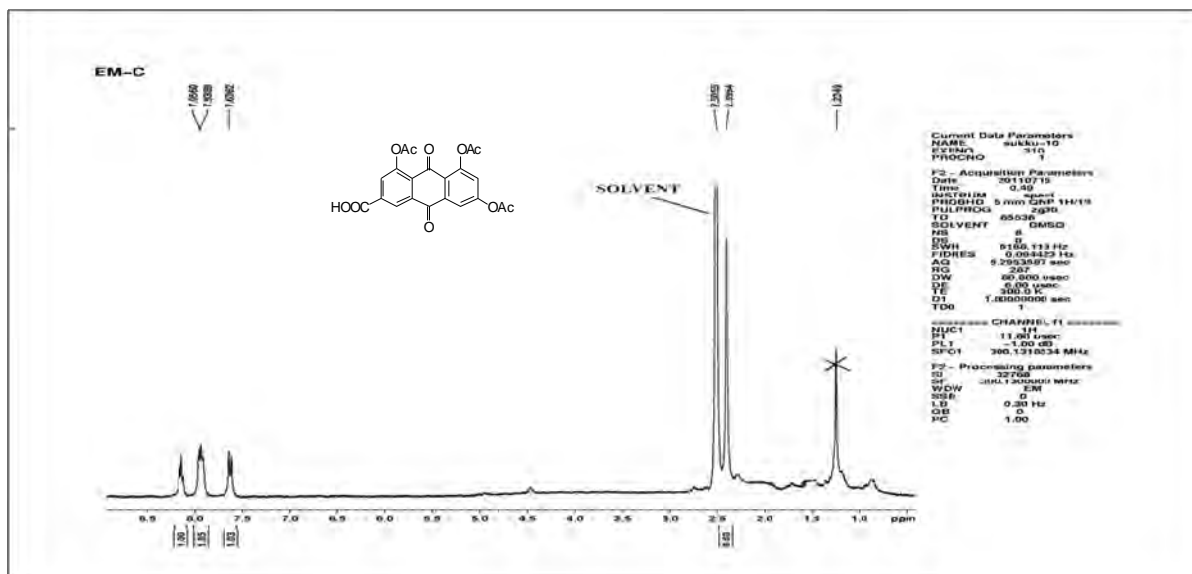

Proton NMR spectrum of compound 18

X= Indicates grease impurities in the spectrum

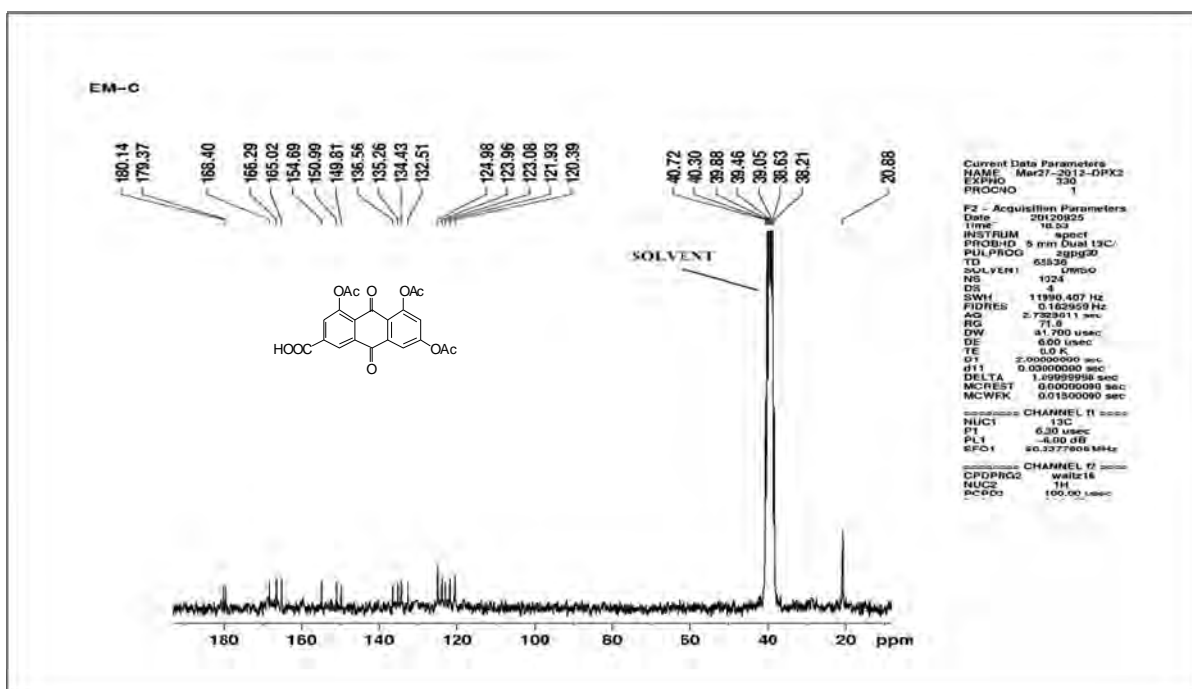

Carbon-13 NMR spectrum of compound 18

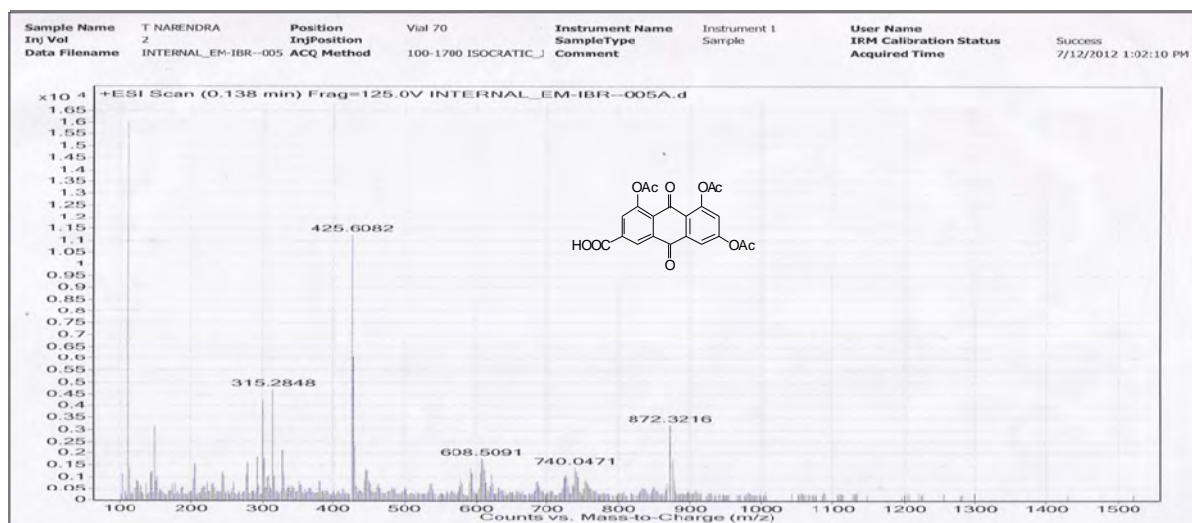

Mass spectrum of compound 18

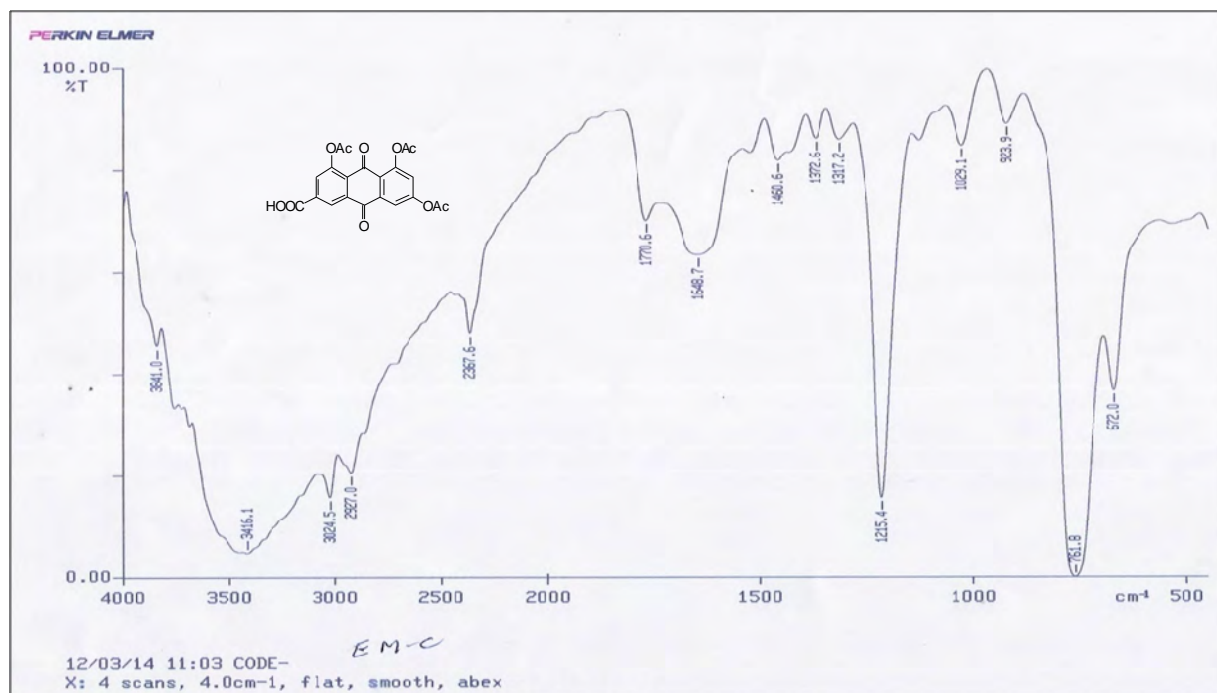

IR spectrum of compound 18

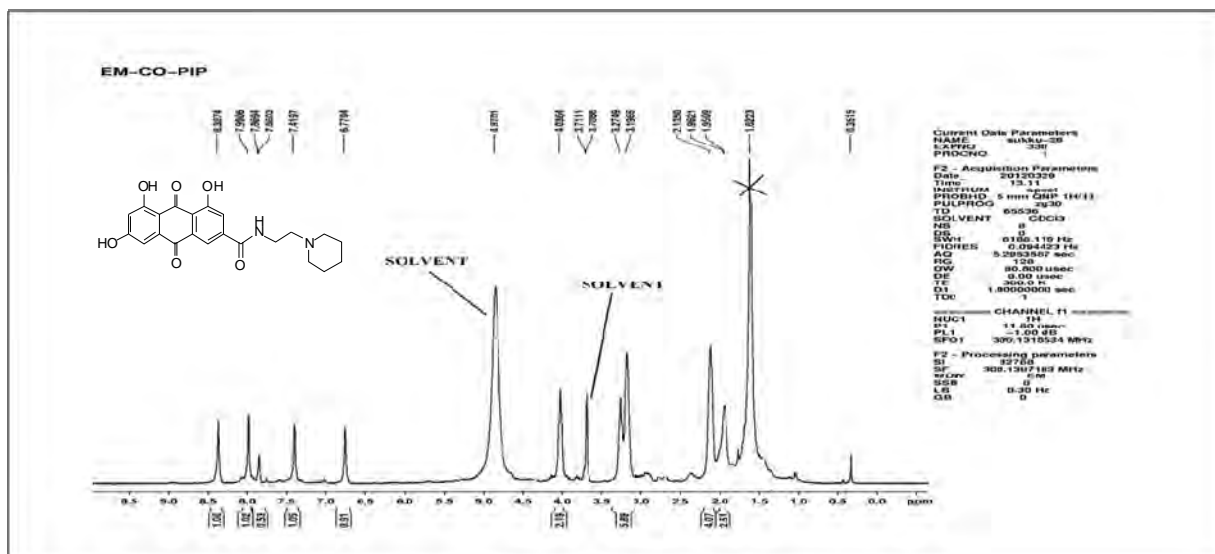

### Proton NMR spectrum of compound 19

X= Indicates grease impurities in the spectrum

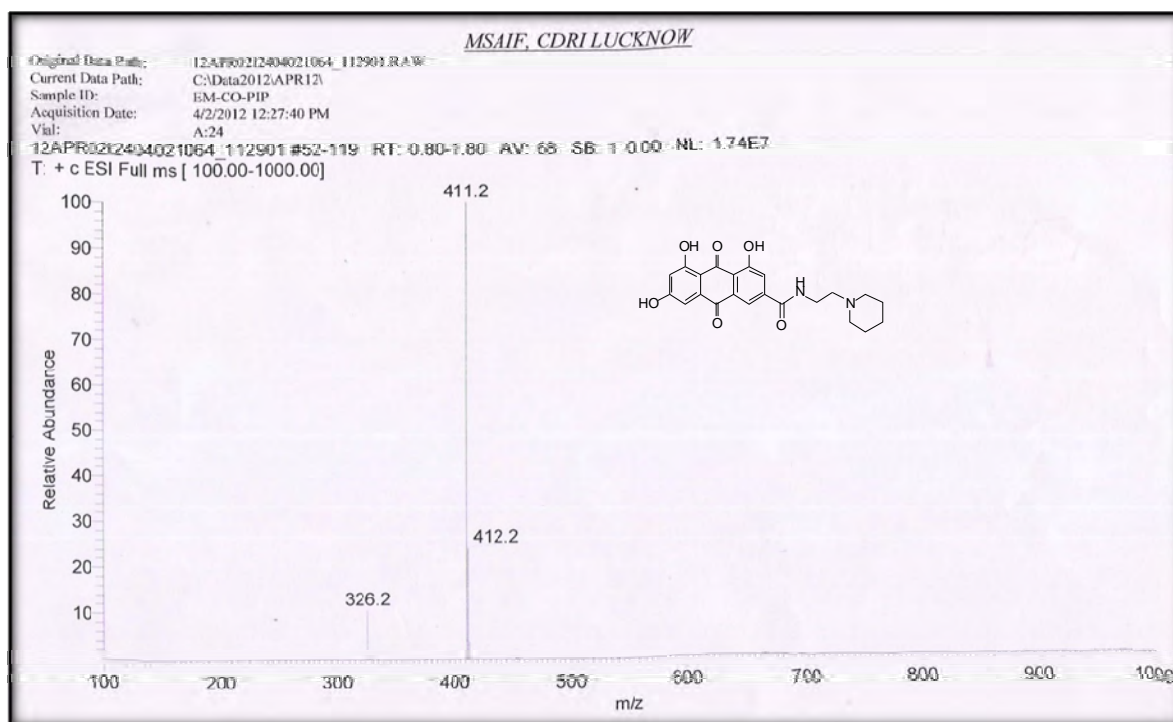

### Mass spectrum of compound 19

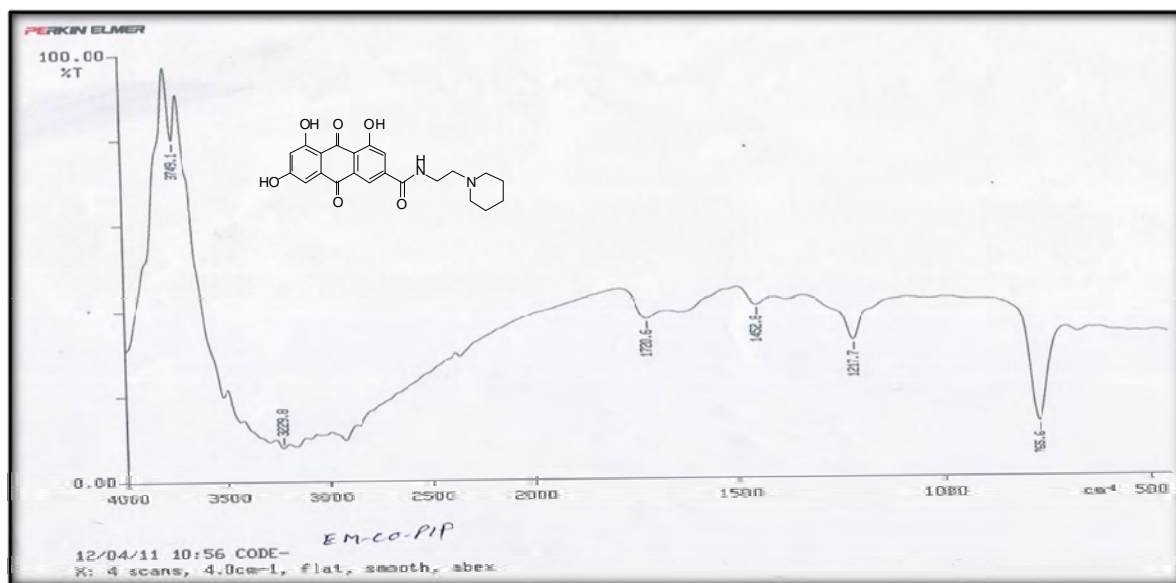

IR spectrum of compound 19

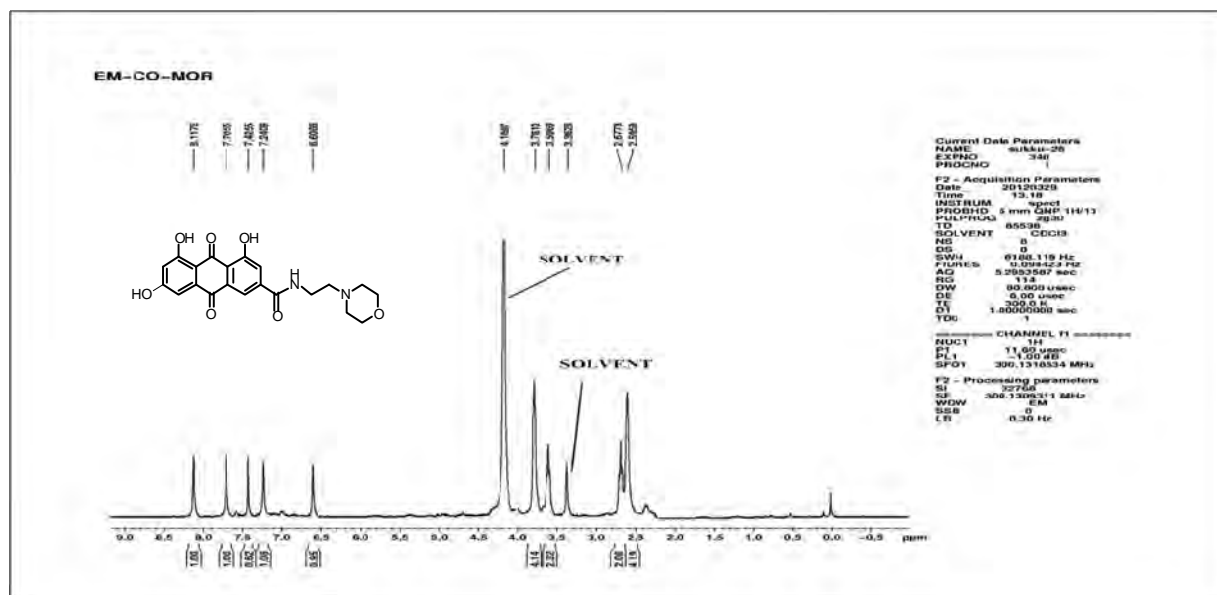

Proton NMR spectrum of compound 20

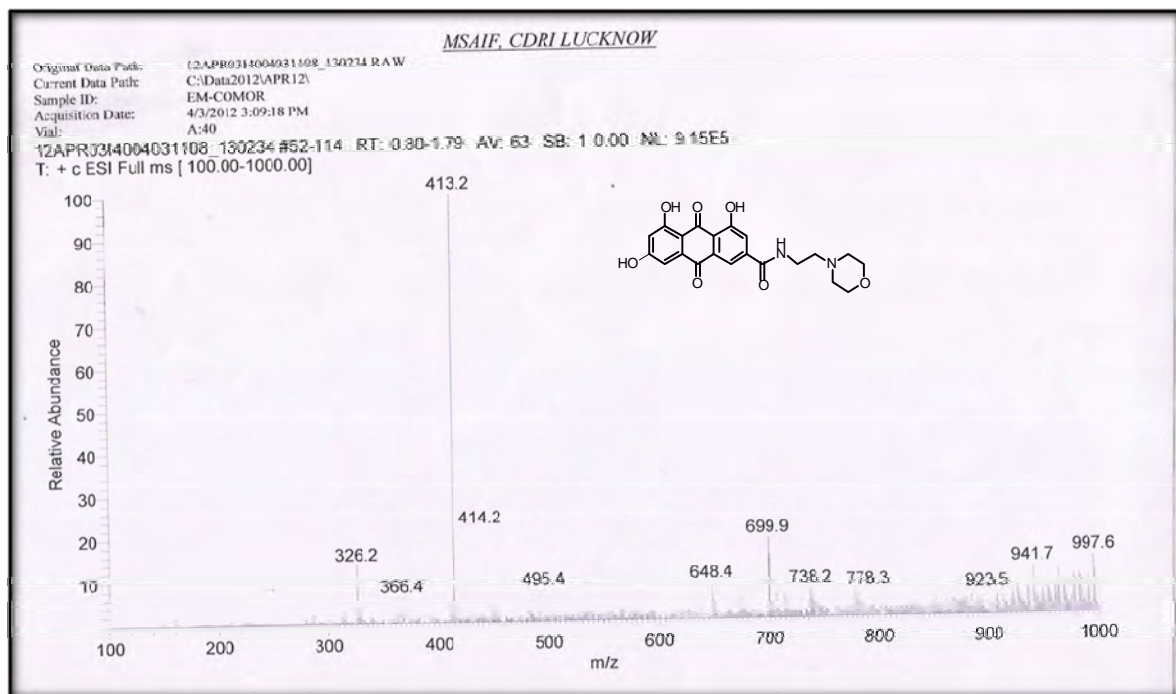

Mass spectrum of compound 20

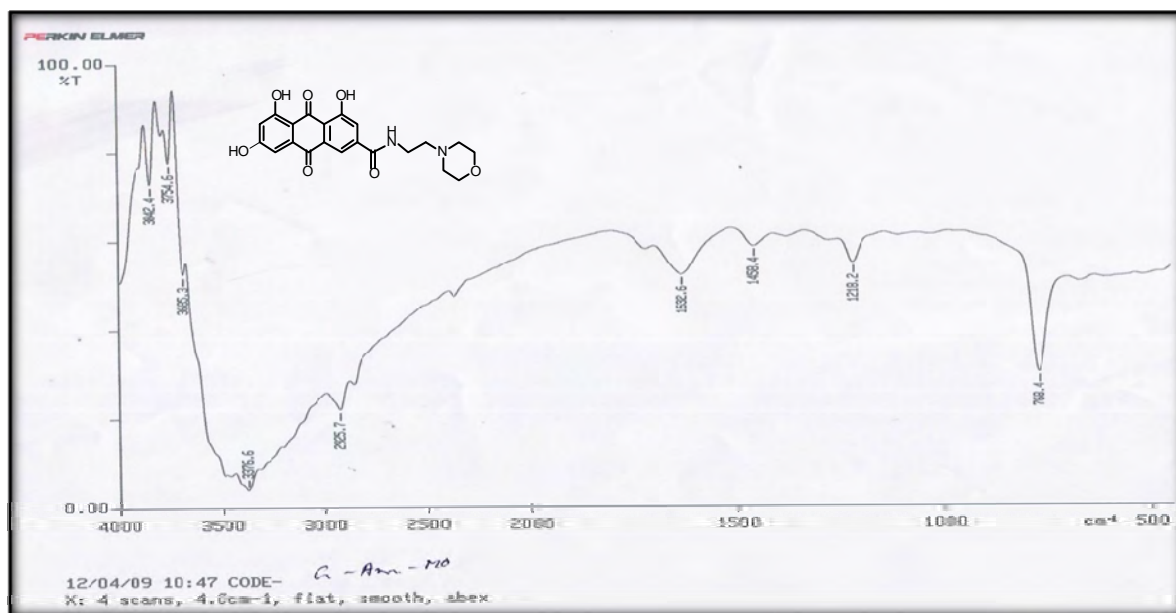

IR spectrum of compound 20
